# Supplementary material for: Reconstruction of a generic metabolic network model of cancer cells
Source: Royal Society of Chemistry journal article supplement (doi:10.1039/c4mb00300d), 2014-09-08
Supplement: c4mb00300d1.xlsx [file c4mb00300d1.xlsx]

## Sheet: Sheet1
Metabolite	Maximum Uptake (mmol / gDW / hour)
chondroitin sulfate A (GalNAc4S-GlcA) proteoglycan	10
Trehalose	10
glycogen, structure 2 (glycogenin-1,6-{7[1,4-Glc], 4[1,4-Glc]})	10
tetracosatetraenoic acid n-6	10
docosa-4,7,10,13,16-pentaenoic acid (n-6)	10
7-alpha,27-Dihydroxycholesterol	10
diacylglycerol (homo sapiens)	10
Cholate	10
Pyridoxine	10
Taurocholic acid	10
GMP	10
disialyl galactosylgloboside (homo sapiens)	10
GD1beta (homo sapiens)	10
myo-Inositol	10
3,4-Dihydroxy-L-phenylalanine	10
Tyr-194 of apo-glycogenin protein (primer for glycogen synthesis)	10
Vitamin D3	10
dihomo-gamma-linolenic acid (n-6)	10
hexacosanoate (n-C26:0)	10
Chloride	10
L-Arginine	10
keratan sulfate I	10
hydroxylated ebastine	10
9-cis-retinol	10
Superoxide anion	10
debrisoquine	10
Ethanol	10
Sphingosine 1-phosphate	10
Deoxyadenosine	10
lysophosphatidylcholine (homo sapiens)	10
Lea glycolipid	10
Estrone 3-sulfate	10
13-cis-retinoyl glucuronide	10
Metanephrine	10
Retinol	10
beta-tocopherol	10
coumarin	10
5-Hydroxy-L-tryptophan	10
paclitaxel	10
L-Homoserine	10
haxglutamyl folate (DHF)	10
Prostaglandin E1	10
estrone glucuronide	10
GDP	10
Thiamin	10
Xylitol	10
sialyl (1,3) sialyl (2,6) galactosylgloboside (homo sapiens)	10
D-Mannose	10
Pyridoxamine	10
Reduced glutathione	10
D-Fructose	10
4-Hydroxyphenylacetate	10
Thiosulfate	10
starch, structure 1 (1,6-{7[1,4-Glc], 4[1,4-Glc]})	10
sialyl (2,3) sialyl (2,6) galactosylgloboside (homo sapiens)	10
Ammonia	10
linoleic acid (all cis C18:2)	10
starch, structure 2 (1,6-{2[1,4-Glc], [1,4-Glc]})	10
R total 3 position	10
alpha-N-Phenylacetyl-L-glutamine	10
Bilirubin monoglucuronide	10
UTP	10
Triiodothyronine	10
heptadecanoate	10
(Gal)6 (Glc)1 (GlcNAc)3 (LFuc)2 (Cer)1	10
Adrenaline	10
naphthalene epoxide	10
5alpha-Dihydrotestosterone sulfate	10
sphingosylphosphorylcholine (homo sapiens)	10
hyaluronan biosynthesis, precursor 1	10
1-alkyl 2-acteylglycerol 3-phosphocholine (homo sapiens)	10
gamma-linolenic acid	10
Lipoate	10
Choline	10
Serotonin	10
D-lactate	10
Cytosine	10
5 hydroxy omeprazole	10
IV3-a-Neu5Ac,III4-a-Fuc-Lc4Cer	10
Lacto-N-fucopentaosyl III ceramide	10
Protoheme	10
estradiol glucuronide	10
3-Methylimidazoleacetic acid	10
Leb glycolipid	10
5-Deoxyadenosine	10
D-Aspartate	10
VI3NeuAc-nLc6Cer	10
Formate	10
Retinoate	10
(R)-3-Hydroxybutanoate transport via H+ symport	10
(Gal)2 (GalNAc)1 (Glc)1 (GlcNAc)1 (LFuc)2 (Cer)1	10
OH1	10
Uridine	10
Nitric oxide	10
L-Leucine	10
Vitamin D2	10
Cys-Gly	10
adp	10
testosterone sulfate	10
clupanodonic acid (docosapentaenoic (n-3))	10
Peptidyl-L-lysine	10
L-Lactate	10
Deoxycytidine	10
D-Glucose	10
androsterone glucuronide	10
glycochenodeoxycholate	10
L-Phenylalanine	10
Hypoxanthine	10
N-Acetyl-beta-D-glucosaminyl-1,2-alpha-D-mannosyl-1,3-(N-acetyl-beta-D-glucosaminyl-1,2-alpha-D-mannosyl-1,6)-(N-acetyl-beta-D-glucosaminyl-1,4)-beta-D-mannosyl-1,4-N-acetyl-beta-D-glucosaminyl-R	10
monoacylglycerol 2 (homo sapiens)	10
CO2	10
keratan sulfate I, degradation product 1	10
D-3-Amino-isobutanoate	10
hexaglutamyl folate (THF)	10
Deoxyguanosine	10
Acetate	10
2,4 dihydroxy nitrophenol	10
Norepinephrine	10
5alpha-Dihydrotestosterone glucuronide	10
L-Cystine	10
4-Nitrophenol	10
pentaglutamyl folate (DHF)	10
2-Methylcitrate	10
Urea	10
fucosyl galactosylgloboside (homo sapiens)	10
3,8-LD1	10
methanol	10
nC20:4	10
Biotin	10
Nicotinamide adenine dinucleotide phosphate	10
Retinyl palminate	10
L-Cysteine	10
K+	10
de-Fuc form of PA6	10
Prostaglandin E2	10
D-Galactose	10
Ley glycolipid	10
octadecenoate (n-C18:1)	10
IV3-a-NeuAc,III3-a-Fuc-nLc4Cer	10
triacylglycerol (homo sapiens)	10
GQ1b (homo sapiens)	10
4 hydroxy tolbutamide	10
beta-Alanine	10
Chenodeoxyglycocholate	10
demethylated antipyrine	10
vaccenic acid	10
L-Glutamine	10
2,6 dimethylheptanoyl carnitine	10
taurochenodeoxycholate	10
L-Serine	10
Aquacob(III)alamin	10
7-alpha,25-Dihydroxycholesterol	10
Nicotinamide	10
Carbon monoxide	10
UDP	10
(Gal)4 (Glc)1 (GlcNAc)3 (LFuc)3 (Cer)1	10
Citrate	10
D-Glucosamine	10
4-Nitrophenyl sulfate	10
Glycerol	10
chondroitin sulfate B / dermatan sulfate (IdoA2S-GalNAc4S) proteoglycan	10
fatty acid 11-cis-retinol	10
D-Xylose	10
Thymine	10
tetracosapentaenoic acid, n-6	10
Nicotinate	10
Inosine	10
Dehydroascorbate	10
L-Asparagine	10
Digalactosylceramidesulfate	10
pentaglutamyl folate (THF)	10
4-Pyridoxate	10
6 beta hydroxy testosterone	10
Hexadecanoate (n-C16:0)	10
(S)-Glycerate	10
Thromboxane A2	10
keratan sulfate II (core 2-linked)	10
Pyridoxal	10
Cytidine	10
Sulfate derivative of norepinephrine	10
5-L-Glutamyl-L-alanine	10
AMP	10
III3Fuc-nLc6Cer	10
Sucrose	10
Adenine	10
(Gal)4 (Glc)1 (GlcNAc)2 (LFuc)1 (Cer)1	10
stearidonic acid	10
glycocholate	10
Bilirubin	10
antipyrene	10
Glycine betaine	10
Creatine	10
chitin	10
(+)-alpha-Pinene	10
Lactose	10
heptaglutamyl folate (DHF)	10
heparan sulfate proteoglycan	10
tetradecanoate (n-C14:0)	10
Sarcosine	10
Phosphate	10
Prostaglandin F2alpha	10
D-Tagatose	10
Thiocyanate	10
L-sulfolactate	10
GTP	10
L-Tryptophan	10
GP1c alpha (homo sapiens)	10
nifedipine	10
phytanic acid	10
Limonene	10
phosphatidylethanolamine (homo sapiens)	10
Deoxyuridine	10
Fe2+	10
eicosatetranoic acid	10
Bilirubin beta-diglucuronide	10
GP1c (homo sapiens)	10
ADPribose 2-phosphate	10
Phosphatidylcholine (homo sapiens)	10
Retinyl palminate	10
heptaglutamyl folate (THF)	10
fatty acid 9-cis-retinol	10
Acetylcholine	10
ATP	10
5,6,7,8-Tetrahydrofolate	10
fatty acid retinol	10
Deoxyribose	10
9-O-Acetylated GD3 (homo sapiens)	10
Biocytin	10
chondroitin sulfate D (GlcNAc6S-GlcA2S) proteoglycan	10
Folate	10
Urate	10
2-Hydroxybutyrate	10
3-mercaptolactate-cysteine disulfide	10
L-Thyroxine	10
alpha-Tocotrienol	10
hydroxylated taxol	10
Cholesterol	10
L-Proline	10
Etiocholan-3alpha-ol-17-one 3-glucuronide	10
Guanine	10
phosphatidylglycerol (homo sapiens)	10
10-Formyltetrahydrofolate	10
4,17 dihydroxy estradiol	10
Butyrate (n-C4:0)	10
Fe3+	10
1 acyl phosphoglycerol	10
alpha-Linolenic acid	10
cAMP	10
PA6	10
Dopamine	10
(Gal)3 (Glc)1 (GlcNAc)1 (LFuc)2 (Cer)1	10
L-Threonine	10
Perillyl alcohol	10
octadecanoate (n-C18:0)	10
L-Arabinose	10
L-Aspartate	10
Maltose	10
omega hydroxy dodecanoate (n-C12:0)	10
(Gal)3 (Glc)1 (GlcNAc)2 (LFuc)3 (Cer)1	10
Deoxyinosine	10
pentadecanoate	10
Calcitroic acid (D3)	10
Ceramide 1-phosphate	10
N-Acetyl-D-glucosamine	10
(Gal)3 (Glc)1 (GlcNAc)1 (LFuc)1 (Cer)1	10
L-Arabinitol	10
L-3-Amino-isobutanoate	10
IDP	10
GQ1balpha (homo sapiens)	10
Glycine	10
tolbutamide	10
Hydrogen cyanide	10
L-Glutamate	10
cholesterol ester (from FULLR2)	10
globoside (homo sapiens)	10
beta-Carotene	10
L-Carnitine	10
25-Hydroxyvitamin D3	10
glycogen, structure 4 (glycogenin-1,6-{2[1,4-Glc], [1,4-Glc]})	10
Acetoacetate	10
Naphthalene	10
UMP	10
L-Isoleucine	10
10-formyltetrahydrofolate-[Glu](7)	10
phosphatidylserine (homo sapiens)	10
chondroitin sulfate E (GalNAc4,6diS-GlcA) proteoglycan	10
Dehydroepiandrosterone sulfate	10
omeprazole	10
2-Oxoglutarate	10
3,5-Cyclic GMP	10
Succinate	10
5alpha-Dihydrotestosterone	10
24R,25-Dihydroxyvitamin D3	10
L-Lysine	10
Acetone	10
linoelaidic acid	10
Thiamin monophosphate	10
L-Valine	10
retinoyl glucuronide	10
Ribitol	10
lignoceric acid	10
Bicarbonate	10
hexadecenoate (n-C16:1)	10
R total	10
omega hydroxy hexadecanoate (n-C16:0)	10
1-alkyl 2-lysoglycerol 3-phosphocholine	10
1-Methylnicotinamide	10
D-Ribose	10
nC22:6	10
nervonic acid	10
Guanosine	10
alpha-Pinene-oxide	10
Dopamine 3-O-sulfate	10
CMP	10
Hydrogen peroxide	10
omega hydroxy tetradecanoate (n-C14:0)	10
Acetaldehyde	10
adrenic acid	10
L-Methionine	10
Propionate	10
Androsterone	10
Iodide	10
aflatoxin B1	10
7,8-Dihydrofolate	10
keratan sulfate II (core 4-linked)	10
Gal-Gal-Gal-Gal-Gal-Glc-Cer (homo sapiens)	10
Benzoate	10
tetracosahexaenoic acid, n-3	10
(E)-carveol	10
cholesterol ester	10
Selenate	10
4 hydroxy debrisoquine	10
9-O-Acetylated GT3 (homo sapiens)	10
Thymidine	10
Methylglyoxal	10
10-formyltetrahydrofolate-[Glu](6)	10
cis-11-retinol	10
L-Ascorbate	10
tetracosapentaenoic acid, n-3	10
D-Proline	10
Pyruvate	10
octanoate (n-C8:0)	10
Arachidic acid	10
Ornithine	10
Calcium	10
20alpha-Hydroxyprogesterone	10
Taurine	10
Uracil	10
Type IIIA glycolipid	10
gamma-Tocopherol	10
Aldosterone	10
L-Tyrosine	10
elaidic acid	10
5-Methyltetrahydrofolate	10
GT1a (homo sapiens)	10
Triiodothyronine sulfate	10
7-alpha,24(S)-Dihydroxycholesterol	10
Nicotinamide adenine dinucleotide	10
Leukotriene C4	10
H2O	10
D-Alanine	10
testosterone glucuronide	10
Maltotriose	10
Oxidized glutathione	10
L-Fucose	10
Oxalate	10
hyaluronan	10
GD1c (homo sapiens)	10
IMP	10
Riboflavin	10
Prostaglandin D2	10
V3Fuc,III3Fuc-nLc6Cer	10
O2	10
L-Alanine	10
Sulfate	10
(R)-Pantothenate	10
Phylloquinone	10
Gal-GlcNAc-Gal globoside (homo sapiens)	10
8,9 epxoy aflatoxin B1	10
Tyramine O-sulfate	10
10-formyltetrahydrofolate-[Glu](5)	10
Histamine	10
24R,25-Dihyoxyvitamin D2	10
hydroxy coumarin	10
ADPribose	10
Adenosine	10
Sphinganine 1-phosphate	10
R total 2 position	10
w hydroxy testosterone	10
3,4-Dihydroxyphenylethyleneglycol	10
25-Hydroxyvitamin D2	10
5-Formyltetrahydrofolate	10
chondroitin sulfate C (GalNAc6S-GlcA) proteoglycan	10
16-Glucuronide-estriol	10
alpha-Tocopherol	10
Sodium	10
Type IIIAb	10
4-Aminobutanoate	10
glycogen, structure 5 (glycogenin-2[1,4-Glc])	10
timnodonic acid	10
D-Serine	10
L-Histidine	10
H+	10
Thiamin triphosphate	10
ebastine	10
