# Supplementary material for: Reconstruction of a generic metabolic network model of cancer cells
Source: Royal Society of Chemistry journal article supplement (doi:10.1039/c4mb00300d), 2014-09-08
Supplement: c4mb00300d2.xlsx [file c4mb00300d2.xlsx]

## Sheet: Table2
DrugCard	Generic Name	Metabolic Targets	Is Anticancer
source: Wishart 2008	source: Wishart 2008	source: Wishart 2008	source: Wishart 2008
DB00025	Antihemophilic Factor	|5264	0
DB00070	Hyaluronidase	|2588	0
DB00109	Enfuvirtide	|1806	0
DB00114	Pyridoxal Phosphate	|10993|2805|875|2805|212|18|51540|5834|84706|51540|8879|1491|189|6470|1644|9517|51380|8942|2875|5837|5836|211|55163|3067|2806|4953|10558|64902|23464|6472|587|79896|6472|586|883|51380|211|29968|2571|1644|2571|5834|113451|2731|4942|6472|189|10841|29968|6472|2571|2572|2572|5834|1644|189|51540|6898|6470|6472|4942|57026|6470|586|51166|11212|4942|51380	0
DB00115	Cyanocobalamin	|4594|166785	0
DB00116	Tetrahydrofolic acid	|6472|471|4524|275|6472|6472|10840|4524|4524|6472|6470|10841|6470|6472|10797|4522|4548|275	0
DB00117	L-Histidine	|10991|3067|3034	0
DB00118	S-Adenosylmethionine	|262|27430|4144|4143|27232|6723|875	0
DB00119	Pyruvic acid	|5162|5091|9194|5315|18|64902|6566|6567|9123|5313|23539	0
DB00120	L-Phenylalanine	|23428|6898|7054|5053	0
DB00121	Biotin	|5095|5096|56922|3141|5091|8884|64087|31|32	0
DB00122	Choline	|5337|9468|60482|1119|1120|5130|43|5338|1103|162466|55349|10390	0
DB00123	L-Lysine	|84889|6541|6542	0
DB00125	L-Arginine	|384|113451|445|84889|435|6541|4846|4843	0
DB00126	Vitamin C	|8985|9963|5352|1621|8424|5351|5033|5264|55217	0
DB00127	Spermine	|112483|6723|26|6723|6303|4953|6611	0
DB00128	L-Aspartic Acid	|2806|159|80150|95|91703|122622|790|2805|445|159|440|2806|443|6505|2805|10606|10165|10165|159|8604|445	0
DB00129	L-Ornithine	|2628|84889|10166|6542|383|6541|5009|4942|83884|384	0
DB00130	L-Glutamine	|2752|1503|55191|790|2744|8833|23428|5471|883|10991|5198|6510|27165|9945|440	0
DB00131	Adenosine monophosphate	|55902|353|5836|2180|5144|2203|107|270|5142|84532	0
DB00132	Alpha-Linolenic Acid	|9415|6785|3992|6546	0
DB00133	L-Serine	|10558|10993|875|189|9517	0
DB00134	L-Methionine	|27430|4144|4548|23743|635|4143	0
DB00135	L-Tyrosine	|7054|6898	0
DB00136	Calcitriol	|1594	0
DB00138	L-Cystine	|11136|23657|6519	0
DB00139	Succinic acid	|8801|8802|9058|5351|6392|8985|6390|8424|1468|8974|6561|8803|64849|5019|6391|7915|55217|64064|8803|5033|6389	0
DB00140	Riboflavin	|55312|645|5836	0
DB00141	N-Acetyl-D-glucosamine	|2683|8703|8704|5973|55577|4669	0
DB00142	L-Glutamic Acid	|2730|83733|27165|5198|55191|6507|51166|2571|2806|6898|5832|29968|6506|8836|2805|586|2356|84706|51557|8833|440|2875|2744|162417|587|10157|26873|2752|2805|2806|2572|2729|6511|6512|79751|2747|10841|18|6505|2746|23657	0
DB00143	Glutathione	|2877|2879|2878|2954|2678|2879|51022|3029|257202|2098|4259|2936|4258|4056|2944|2876|2937|2739|2745|2876	0
DB00144	Phosphatidylserine	|55512|113026|10396|5286|9791|1608|81490|23761|8527|1607	0
DB00145	Glycine	|9152|2731|6536|2937|64902|189|2628|27232|6472|6472|2653|140679|570|6470|23464|6472|212|206358|51268|6472|211|6472	0
DB00146	Calcidiol	|1594	0
DB00147	Pyridoxal	|57026|8566	0
DB00148	Creatine	|2593|1160|1152|1158|6535|2628	0
DB00149	L-Leucine	|587|586	0
DB00150	L-Tryptophan	|3620|1644|7166|121278	0
DB00151	L-Cysteine	|2730|875|51380|2729|2937|2805|80704|1036|1491	0
DB00152	Thiamine	|80704|27010	0
DB00153	Ergocalciferol	|1594	0
DB00154	gamma-Homolinolenic acid	|5742|5743	0
DB00155	L-Citrulline	|4842|445|4843|445|5009|4846	0
DB00156	L-Threonine	|79896	0
DB00157	NADH	|4708|4719|29920|2746|4712|4538|35|4191|501|3294|4696|3419|221|222|23530|7299|4190|3948|5160|1036|4724|4702|11112|4697|10157|125|4537|4535|622|3295|6652|4723|1719|51478|275|2819|3293|1962|9563|3421|4199|3614|3945|4522|7358|1717|218|4716|4704|217|3163|5860|3283|4329|4540|1645|216|4539|4725|4726|50814|3030|4720|4694|3291|5162|4541|4701|4706|7923|2597|8854|3284|8659|3292|128|4536|220|10797|2747|3162…	0
DB00158	Folic Acid	|113235|2352|8836	0
DB00159	Icosapent	|2181|3992|2182|6546|5743|5742	0
DB00160	L-Alanine	|84706|206358|6509|23428|2875|189|18|64902|8942	0
DB00161	L-Valine	|586|5096	0
DB00162	Vitamin A	|51109|216|57665|145226|9227|112724|50700|5959|8854|220	0
DB00163	Vitamin E	|1606|240	0
DB00165	Pyridoxine	|875|501|29968|8566|57026	0
DB00166	Lipoic Acid	|8884	0
DB00167	L-Isoleucine	|586|36|587	0
DB00169	Cholecalciferol	|1593	0
DB00171	Adenosine triphosphate	|2180|55902|445|19|291|84532|22978|440|107|8647	0
DB00172	L-Proline	|11212|5625|5831|65263|29920|65263|11254|6534|29920|8974|5033	0
DB00173	Adenine	|4507|353	0
DB00174	L-Asparagine	|10991|440|6510|80150	0
DB00175	Pravastatin	|10599|3156	0
DB00176	Fluvoxamine	|6532	0
DB00755	Tretinoin	|8854|216	1
DB00180	Flunisolide	|5321	0
DB00182	Amphetamine	|6531	0
DB00190	Carbidopa	|1644	0
DB00191	Phentermine	|6532|4128|6531|6530|4129	0
DB00193	Tramadol	|6532|6530	0
DB01241	Gemfibrozil	|10599|4023	0
DB00197	Troglitazone	|2182|2030	0
DB00198	Oseltamivir	|4758	0
DB00200	Hydroxocobalamin	|4548|166785|4594	0
DB00201	Caffeine	|5142	0
DB00203	Sildenafil	|5138|8654	0
DB00196	Fluconazole	|1595	0
DB00206	Reserpine	|6571	0
DB00213	Pantoprazole	|495|476	0
DB00214	Torasemide	|6557	0
DB00215	Citalopram	|6532	0
DB00217	Bethanidine	|6530	0
DB00226	Guanadrel Sulfate	|6530	0
DB00251	Terconazole	|1595	0
DB00228	Enflurane	|4535|513	0
DB00232	Methyclothiazide	|760|762|476|6557|759	0
DB00234	Reboxetine	|6530	0
DB00235	Milrinone	|5141|5139	0
DB01181	Ifosfamide	|1786	1
DB00244	Mesalazine	|5743|5742	0
DB00245	Benztropine	|6531	0
DB01026	Ketoconazole	|1595	0
DB01110	Miconazole	|1595	0
DB00253	Medrysone	|5321	0
DB00262	Carmustine	|2936	1
DB00563	Methotrexate	|1719	1
DB00273	Topiramate	|760|762	0
DB00277	Theophylline	|8654|5142|5139|5141	0
DB01167	Itraconazole	|1595	0
DB00284	Acarbose	|6476|2548|8972|279	0
DB00285	Venlafaxine	|6530|6532	0
DB00289	Atomoxetine	|6530	0
DB00292	Etomidate	|6513	0
DB00293	Raltitrexed	|7298	1
DB00310	Chlorthalidone	|6557	0
DB00311	Ethoxzolamide	|759	0
DB00313	Valproic Acid	|36|18	0
DB00316	Acetaminophen	|5743|5742	0
DB00321	Amitriptyline	|6530|6532	0
DB00205	Pyrimethamine	|1719	0
DB00323	Tolcapone	|1312	0
DB00324	Fluorometholone	|5321	0
DB00325	Nitroprusside	|4881	0
DB00328	Indomethacin	|5743|5742	0
DB00338	Omeprazole	|495	0
DB00250	Dapsone	|1719	0
DB00344	Protriptyline	|6532|6530	0
DB00348	Nitisinone	|3242	0
DB00350	Minoxidil	|5351|5742	0
DB00642	Pemetrexed	|2618|1719|2618|7298	1
DB00357	Aminoglutethimide	|1588	0
DB00360	Tetrahydrobiopterin	|7054|4846|5053|7166	0
DB00368	Norepinephrine	|6530|5053	0
DB00381	Amlodipine	|759	0
DB00382	Tacrine	|43	0
DB00386	Alseroxylon	|6571	0
DB00389	Carbimazole	|7173	0
DB00390	Digoxin	|10599|476	0
DB00396	Progesterone	|1586	0
DB00440	Trimethoprim	|1719	0
DB00419	Miglustat	|7357	0
DB00422	Methylphenidate	|6532|6530|6531	0
DB00555	Lamotrigine	|1719	0
DB00435	Nitric Oxide	|4881	0
DB00436	Bendroflumethiazide	|760|759|6559|762	0
DB00437	Allopurinol	|7498	0
DB01093	Dimethyl sulfoxide	|1719	0
DB01131	Proguanil	|1719	0
DB01033	Mercaptopurine	|3615|3251|2766|51292|158|3614|271|8833|270|272|5471	1
DB00448	Lansoprazole	|495	0
DB00458	Imipramine	|6532|6530	0
DB00461	Nabumetone	|5743|5742	0
DB00465	Ketorolac	|5743|5742	0
DB00469	Tenoxicam	|5743|5742	0
DB00471	Montelukast	|240	0
DB00472	Fluoxetine	|6532	0
DB00476	Duloxetine	|6530|6531|6532	0
DB00480	Lenalidomide	|5743	0
DB00352	Thioguanine	|3614|3251|5471	1
DB00483	Gallamine Triethiodide	|43	0
DB00491	Miglitol	|8972	0
DB00494	Entacapone	|1312	0
DB00500	Tolmetin	|5743|5742	0
DB00510	Divalproex sodium	|18	0
DB00511	Acetyldigitoxin	|476	0
DB00514	Dextromethorphan	|6532	0
DB00522	Bentiromide	|5406	0
DB00524	Metolazone	|6559|6557	0
DB00533	Rofecoxib	|5742|5743	0
DB00534	Chlormerodrin	|6557|7915	0
DB00535	Cefdinir	|4353	0
DB00536	Guanidine	|217	0
DB00540	Nortriptyline	|6530|6532	0
DB00543	Amoxapine	|6530|6532	0
DB00242	Cladribine	|100|4860	1
DB00545	Pyridostigmine	|43	0
DB00548	Azelaic Acid	|7299|6716	0
DB00550	Propylthiouracil	|7173	0
DB01073	Fludarabine	|100|6240	1
DB00553	Methoxsalen	|1548	0
DB00554	Piroxicam	|5742	0
DB01157	Trimetrexate	|1719	0
DB00559	Bosentan	|8647	0
DB00562	Benzthiazide	|760|759|762|6559	0
DB00631	Clofarabine	|6240	1
DB00572	Atropine	|43	0
DB00573	Fenoprofen	|5743|5742	0
DB00579	Mazindol	|6531|6530	0
DB00580	Valdecoxib	|5743	0
DB00583	L-Carnitine	|6583|1376|1384|1374|6584|54677|788	0
DB00586	Diclofenac	|5743|5742	0
DB00588	Fluticasone Propionate	|5321	0
DB00591	Fluocinolone Acetonide	|5321	0
DB00594	Amiloride	|26|6548	0
DB00605	Sulindac	|5742|5743|5138|231	0
DB00606	Cyclothiazide	|760|759|762	0
DB00613	Amodiaquine	|3176	0
DB00627	Niacin	|23475|4837	0
DB02104	2,4-Diamino-5-Methyl-6-[(3,4,5-Trimethoxy-N-Methylanilino)Methyl]Pyrido[2,3-D]Pyrimidine	|1719	0
DB00544	Fluorouracil	|7298	1
DB02559	6-(Octahydro-1h-Indol-1-Ylmethyl)Decahydroquinazoline-2,4-Diamine	|1719	0
DB00640	Adenosine	|107	0
DB02583	N6-(2,5-Dimethoxy-Benzyl)-N6-Methyl-Pyrido[2,3-D]Pyrimidine-2,4,6-Triamine	|1719	0
DB00441	Gemcitabine	|7298|51727|6240	1
DB01101	Capecitabine	|1806|7298	1
DB02919	2,4-Diamino-6-[N-(3',4',5'-Trimethoxybenzyl)-N-Methylamino]Pyrido[2,3-D]Pyrimidine	|1719	0
DB00651	Dyphylline	|5141|5144|5150|5143|5142|27115	0
DB00655	Estrone	|1545|412	0
DB00656	Trazodone	|6530|6532	0
DB00661	Verapamil	|759	0
DB00668	Epinephrine	|5053	0
DB00674	Galantamine	|43	0
DB00675	Tamoxifen	|1890	0
DB00677	Isoflurophate	|43	0
DB00688	Mycophenolate mofetil	|3614|3615	0
DB00692	Phentolamine	|5141	0
DB00694	Daunorubicin	|4363	1
DB00695	Furosemide	|476|6557	0
DB00696	Ergotamine	|6530	0
DB00703	Methazolamide	|759	0
DB03060	Sri-9662	|1719	0
DB00711	Diethylcarbamazine	|4512|240	0
DB00712	Flurbiprofen	|5742|5743	0
DB00715	Paroxetine	|6530|6532	0
DB00720	Clodronate	|293|291|292	0
DB00721	Procaine	|6531	0
DB00726	Trimipramine	|6530|6532	0
DB00727	Nitroglycerin	|217|4881	0
DB03351	Sri-9439	|1719	0
DB00736	Esomeprazole	|476|495	0
DB00741	Hydrocortisone	|4843|240	0
DB00744	Zileuton	|240|246	0
DB00745	Modafinil	|6531	0
DB00749	Etodolac	|5743|5742	0
DB00752	Tranylcypromine	|4128|4129	0
DB00753	Isoflurane	|4535|513	0
DB00855	Aminolevulinic acid	|210	1
DB00761	Potassium Chloride	|6557|9990|10723|57468|6558|6560	0
DB00763	Methimazole	|7173	0
DB00765	Metyrosine	|7054	0
DB00774	Hydroflumethiazide	|760|762|476|759|6557	0
DB00780	Phenelzine	|4128|4129|8639	0
DB00784	Mefenamic acid	|5742|5743	0
DB00787	Aciclovir	|4860	0
DB00788	Naproxen	|5743|5742	0
DB00795	Sulfasalazine	|23657|38	0
DB00802	Alfentanil	|1577	0
DB00805	Minaprine	|6532	0
DB00806	Pentoxifylline	|4907|5141|8654|5142	0
DB00811	Ribavirin	|22978|5167|3614	0
DB00812	Phenylbutazone	|5740|5743	0
DB00814	Meloxicam	|5743	0
DB00819	Acetazolamide	|771|759|760	0
DB00820	Tadalafil	|8654|5141	0
DB00821	Carprofen	|5743	0
DB00822	Disulfiram	|217	0
DB00824	Enprofylline	|5141|5142	0
DB00830	Phenmetrazine	|4128|6531|6530	0
DB00831	Trifluoperazine	|495	0
DB00843	Donepezil	|43	0
DB00846	Flurandrenolide	|5321	0
DB00848	Levamisole	|251	0
DB00850	Perphenazine	|1565	0
DB01005	Hydroxyurea	|6240	1
DB03695	6-(2,5-Dimethoxy-Benzyl)-5-Methyl-Pyrido[2,3-D]Pyrimidine-2,4-Diamine	|1719	0
DB00861	Diflunisal	|5743|5742	0
DB00862	Vardenafil	|8654	0
DB00869	Dorzolamide	|760	0
DB00870	Suprofen	|5743|5742	0
DB00880	Chlorothiazide	|760|759|762|6559	0
DB00883	Isosorbide Dinitrate	|4881	0
DB02262	Orotic Acid	|1723	0
DB00887	Bumetanide	|57468|6558|6557|6560	0
DB00894	Testolactone	|1588	0
DB00903	Ethacrynic acid	|476|6557	0
DB00906	Tiagabine	|6529|18	0
DB00907	Cocaine	|6530|6529|6532|6531	0
DB00909	Zonisamide	|759	0
DB00920	Ketotifen	|27115|5150	0
DB00928	Azacitidine	|1786	0
DB00934	Maprotiline	|6530|4129	0
DB00936	Salicyclic acid	|5743|5742	0
DB00937	Diethylpropion	|6531|6530	0
DB00939	Meclofenamic acid	|240|5743|5742	0
DB00944	Demecarium bromide	|43	0
DB00945	Aspirin	|5743|5742	0
DB00951	Isoniazid	|18	0
DB00963	Bromfenac	|5743|5742	0
DB02613	Decylamine-N,N-Dimethyl-N-Oxide	|1723	0
DB00975	Dipyridamole	|100|8654|10846|5141	0
DB00981	Physostigmine	|43	0
DB00988	Dopamine	|1621	0
DB00989	Rivastigmine	|43	0
DB00990	Exemestane	|1588	0
DB00991	Oxaprozin	|5743	0
DB03480	Brequinar Analog	|1723	0
DB00996	Gabapentin	|586	0
DB00999	Hydrochlorothiazide	|760|759|762|6559	0
DB00552	Pentostatin	|100	1
DB01006	Letrozole	|1588	0
DB01009	Ketoprofen	|5743|5742	0
DB01010	Edrophonium	|43	0
DB01011	Metyrapone	|1576	0
DB01014	Balsalazide	|5743|5742	0
DB01016	Glibenclamide	|8714|4363|8647|19	0
DB01017	Minocycline	|240	0
DB01020	Isosorbide Mononitrate	|4881	0
DB01021	Trichlormethiazide	|760|762|6557|476|759	0
DB01024	Mycophenolic acid	|3614|3615	0
DB03805	Antiproliferative Agent A771726	|1723	0
DB01028	Methoxyflurane	|4535|513	0
DB01031	Ethinamate	|759|760	0
DB01032	Probenecid	|4363	0
DB00179	Masoprocol	|240|246	1
DB04583	5-(AMINOCARBONYL)-1,1':4',1''-TERPHENYL-3-CARBOXYLICACID	|1723	0
DB01035	Procainamide	|1786	0
DB01037	Selegiline	|4129	0
DB01041	Thalidomide	|5743	0
DB01047	Fluocinonide	|5321	0
DB01049	Ergoloid mesylate	|11309	0
DB01050	Ibuprofen	|5743|5742	0
DB01055	Mimosine	|7299|6470	0
DB01064	Isoproterenol	|5295	0
DB00648	Mitotane	|1584	1
DB01074	Perhexiline	|1376|1374	0
DB03247	Riboflavin Monophosphate	|1723|60490|645|55163|55312	0
DB01078	Deslanoside	|476	0
DB01079	Tegaserod	|6532	0
DB01080	Vigabatrin	|18	0
DB01643	Thymidine-5'-Phosphate	|1841|7298	0
DB01088	Iloprost	|5141	0
DB00339	Pyrazinamide	|2194	0
DB01092	Ouabain	|476	0
DB01034	Cerulenin	|2194	0
DB01083	Orlistat	|2194|4023|5406	0
DB00282	Pamidronate	|2224	0
DB00399	Zoledronate	|2224	0
DB00630	Alendronate	|2224	0
DB01099	Flucytosine	|1786	0
DB00482	Celecoxib	|5743	1
DB01103	Quinacrine	|5334|8398|240|5321	0
DB01104	Sertraline	|6532	0
DB01105	Sibutramine	|6530|6532	0
DB01108	Trilostane	|3284|3283	0
DB00710	Ibandronate	|2224	0
DB01113	Papaverine	|5142	0
DB00884	Risedronate	|2224	0
DB01119	Diazoxide	|760|476|6559|762|759	0
DB01122	Ambenonium	|43	0
DB01126	Dutasteride	|6716|6715	0
DB01129	Rabeprazole	|495|496	0
DB02782	1-Hydroxy-2-(3-Pyridinyl)Ethylidene Bis-Phosphonic Acid	|2224	0
DB01136	Carvedilol	|4718	0
DB01138	Sulfinpyrazone	|4363	0
DB01140	Cefadroxil	|6565	0
DB01142	Doxepin	|6530|6532	0
DB01143	Amifostine	|251|5167	0
DB01144	Dichlorphenamide	|759	0
DB01149	Nefazodone	|6530|6532	0
DB01151	Desipramine	|6532|6530	0
DB01156	Bupropion	|6530|6531	0
DB04635	[1-HYDROXY-3-(METHYL-PENTYL-AMINO)-1-PHOSPHONO-PROPYL]-PHOSPHONIC ACID	|2224	0
DB01158	Bretylium	|476	0
DB01159	Halothane	|513|4535	0
DB01161	Chloroprocaine	|6531	0
DB01166	Cilostazol	|5139|5141|5142	0
DB04714	ISOPENTENYL PYROPHOSPHATE	|2224	0
DB01170	Guanethidine	|6530	0
DB01171	Moclobemide	|4128	0
DB01175	Escitalopram	|6532	0
DB00261	Anagrelide	|5139	1
DB01188	Ciclopirox	|5743|5742|246	0
DB01189	Desflurane	|4535|513	0
DB01191	Dexfenfluramine	|6532	0
DB01194	Brinzolamide	|760|759	0
DB01197	Captopril	|476	0
DB01199	Tubocurarine	|43	0
DB01200	Bromocriptine	|113	0
DB01202	Levetiracetam	|759	0
DB01207	Ridogrel	|6916	0
DB01213	Fomepizole	|126|125|847|124	0
DB01216	Finasteride	|6715	0
DB01217	Anastrozole	|1588	0
DB01223	Aminophylline	|5139	0
DB01232	Saquinavir	|4363	0
DB01234	Dexamethasone	|4843	0
DB01235	Levodopa	|1312|5053	0
DB01236	Sevoflurane	|4535|513	0
DB01240	Epoprostenol	|5743	0
DB01097	Leflunomide	|240|1723	0
DB01242	Clomipramine	|6530|6532	0
DB01244	Bepridil	|476	0
DB01245	Decamethonium	|43	0
DB01247	Isocarboxazid	|4129|4128	0
DB01255	Lisdexamfetamine	|6531	0
DB01262	Decitabine	|1786	0
DB01275	Hydralazine	|5033|8639	0
DB01283	Lumiracoxib	|5742|5743	0
DB01324	Polythiazide	|6559	0
DB01325	Quinethazone	|760|759|6559|762	0
DB01327	Cefazolin	|10257	0
DB01345	Potassium	|476	0
DB01356	Lithium	|3628|3612|3613	0
DB01364	Ephedrine	|43	0
DB01367	Rasagiline	|4129	0
DB01370	Aluminium	|476	0
DB01378	Magnesium	|476	0
DB03461	2'-Monophosphoadenosine 5'-Diphosphoribose	|2539|231|645|3290|3417|1645|3292|6697|1719|3156|51181|4522|23530	0
DB01396	Digitoxin	|476	0
DB01399	Salsalate	|5743|5742	0
DB01400	Neostigmine	|43	0
DB01404	Ginseng	|5743	0
DB01427	Amrinone	|5139|5142	0
DB01430	Almitrine	|476	0
DB01442	MMDA	|6532	0
DB01454	3,4-Methylenedioxymethamphetamine	|6532	0
DB01463	Fencamfamine	|6531	0
DB01497	Etorphine	|113	0
DB01536	4-Androstenedione	|3292	0
DB01544	Flunitrazepam	|54490	0
DB01576	Dextroamphetamine	|6531	0
DB01600	Tiaprofenic acid	|5743	0
DB01613	Erythrityl Tetranitrate	|4882|4881	0
DB01628	Etoricoxib	|5743	0
DB01640	(5r)-6-(4-{[2-(3-Iodobenzyl)-3-Oxocyclohex-1-En-1-Yl]Amino}Phenyl)-5-Methyl-4,5-Dihydropyridazin-3(2h)-One	|5140	0
DB01907	Nicotinamide-Adenine-Dinucleotide	|2597|3615|3292|126|5860|131|2936|64802|4200|3945|128|217|3028|124|191|349565|125|3033|2582|3295|6652	0
DB01644	3,6-Dihydroxy-Xanthene-9-Propionic Acid	|2936	0
DB01647	(R)-Mesopram	|5142	0
DB01667	8-Azaguanine	|4860	0
DB01671	4-(Hydroxymercury)Benzoic Acid	|760	0
DB01675	Methacrylyl-Coenzyme A	|27034	0
DB01677	Fumarate	|4200	0
DB01686	N,N-dimethylarginine	|4843	0
DB01689	Inhibitor Idd 384	|231	0
DB01692	Dithioerythritol	|7083	0
DB01693	Ribavirin Monophosphate	|3615	0
DB01694	D-tartaric acid	|27087	0
DB01696	7,9-Dihydro-1h-Purine-2,6,8(3h)-Trione	|5836	0
DB02236	Glycinamide Ribonucleotide	|2618	0
DB01708	3-Beta-Hydroxy-5-Androsten-17-One	|6820|6822|3292	0
DB01717	Bis(Adenosine)-5'-Pentaphosphate	|203	0
DB01727	Isocitric Acid	|3417	0
DB01748	N-Benzyl-4-Sulfamoyl-Benzamide	|760	0
DB01752	S-Adenosyl-L-Homocysteine	|3176|5409|1787|80854	0
DB01763	Tatp	|23530	0
DB01784	4-Flourobenzenesulfonamide	|760	0
DB01812	Adenosine-3'-5'-Diphosphate	|9955|6817|6822|6783|6820|3340	0
DB01819	Phosphoenolpyruvate	|5105	0
DB03546	10-CF3C(OH)2-DDACTHF	|2618	0
DB01892	Hyperforin	|240|5742	0
DB03106	Myo-Inositol	|2629|10423	0
DB01915	S-Hydroxycysteine	|39	0
DB01917	Putrescine	|262	0
DB01922	Maltosyl-Alpha (1,4)-D-Gluconhydroximo-1,5-Lactam	|279	0
DB01942	Formic Acid	|760	0
DB01954	4-[3-(Cyclopentyloxy)-4-Methoxyphenyl]-2-Pyrrolidinone	|5142|5144	0
DB01955	1,4-Butanediol	|11253	0
DB01959	3,5-Dimethyl-1-(3-Nitrophenyl)-1h-Pyrazole-4-Carboxylic Acid Ethyl Ester	|5142	0
DB01964	AL5424	|760	0
DB01970	Hg9a-9, Nonanoyl-N-Hydroxyethylglucamide	|5140	0
DB01972	Guanosine-5'-Monophosphate	|8654|2766	0
DB03131	Beta-Mercaptoethanol	|2821|7298|1787|1645|760|27232|7389|8836|2628	0
DB01997	3-Bromo-7-Nitroindazole	|4846	0
DB02007	Alpha-D-Glucose-6-Phosphate	|231|3098	0
DB02008	1-(2-Fluorobenzyl)-3-Butyl-8-(N-Acetyl-4-Aminobenzyl)-Xanthine	|5105	0
DB02010	Staurosporine	|5294	0
DB02011	N-(Phosphonoacetyl)-L-Ornithine	|5009	0
DB04184	Acetate Ion	|3029|847|3939|4522|5105|1723|4048|131|124583|84444|760	0
DB02020	Alrestatin	|231	0
DB02021	Fidarestat	|231	0
DB02054	Gabaculine	|4942	0
DB02068	Delta-Amino Valeric Acid	|2628	0
DB02069	N-(2-Flouro-Benzyl)-4-Sulfamoyl-Benzamide	|760	0
DB02073	Biliverdine Ix Alpha	|645|3162	0
DB02079	(Aminooxy)Acetic Acid	|189	0
DB02087	3,5-Difluorobenzenesulfonamide	|760	0
DB02089	CP-526423	|5836	0
DB02095	Isatin	|4129	0
DB02097	Cytidine	|7371	0
DB02101	Fidarestat(Stereoisomer)	|231	0
DB00227	Lovastatin	|3156	0
DB02115	Daidzin	|217	0
DB02131	N-1-Methylheptylformamide	|126	0
DB02132	[3-(4-Bromo-2-Fluoro-Benzyl)-7-Chloro-2,4-Dioxo-3,4-Dihydro-2h-Quinazolin-1-Yl]-Acetic Acid	|231	0
DB02142	Pyridoxamine-5'-Phosphate	|587|883	0
DB02153	3-Sulfinoalanine	|2936|7001	0
DB02158	(1s)-1-(9-Deazaadenin-9-Yl)-1,4,5-Trideoxy-1,4-Imino-5-Methylthio-D-Ribitol	|4507	0
DB02165	Zinc Trihydroxide	|2944	0
DB02187	Equilin	|3292	0
DB02196	Uridine-Diphosphate-N-Acetylgalactosamine	|2582|6675|28	0
DB02207	7-Nitroindazole	|4846	0
DB02211	N-Methyl-N-Propargyl-1(R)-Aminoindan	|4129	0
DB02217	Dpb-T	|56953	0
DB02218	N-[4-Hydroxymethyl-Cyclohexan-6-Yl-1,2,3-Triol]-4,6-Dideoxy-4-Aminoglucopyranoside	|279	0
DB02220	Al7089a	|760	0
DB02221	4-(Aminosulfonyl)-N-[(2,4,6-Trifluorophenyl)Methyl]-Benzamide	|760	0
DB02230	Immucillin-G	|4860	0
DB02234	Ethylisothiourea	|4843	0
DB00439	Cerivastatin	|3156	0
DB00641	Simvastatin	|3156	0
DB02264	O2-Sulfo-Glucuronic Acid	|9955	0
DB02272	Porphobilinogen	|210	0
DB02281	Formycin	|4507	0
DB02282	5'-Deoxy-5'-Methylthioadenosine	|4507	0
DB02292	6-Oxo-8,9,10,11-Tetrahydro-7h-Cyclohepta[C][1]Benzopyran-3-O-Sulfamate	|760	0
DB01076	Atorvastatin	|3156	0
DB02320	1-N-Acetyl-Beta-D-Glucosamine	|5836	0
DB02323	EM-1745	|3292	0
DB02325	Isopropyl Alcohol	|191|1118|2643	0
DB02329	Carbenoxolone	|3290	0
DB02337	S-(D-Carboxybutyl)-L-Homocysteine	|635	0
DB02358	LY374571	|4522	0
DB02377	Guanine	|2643|4860	0
DB02379	Beta-D-Glucose	|10007|3098|53343|276|2645|5836|279	0
DB02383	Tolrestat	|231	0
DB02392	2'3'-Dideoxyinosine	|4860	0
DB02401	4-Hydroxy-1,2,5-Oxadiazole-3-Carboxylic Acid	|3945	0
DB02422	Methyl-2-S-(Alpha-D-Mannopyranosyl)-2-Thio-Alpha-D-Mannopyranoside	|11253	0
DB02429	4-(Aminosulfonyl)-N-[(4-Fluorophenyl)Methyl]-Benzamide	|760	0
DB02431	Cytidine-5'-Triphosphate	|7371	0
DB02445	2-Deoxy-2-Amino Glucitol-6-Phosphate	|10007	0
DB02452	Thymidine-5'-Triphosphate	|7083	0
DB02458	Glutathione S-(2,4 Dinitrobenzene)	|2944	0
DB02468	12-Phenylheme	|3162	0
DB02479	(R)-N-(3-Indol-1-Yl-2-Methyl-Propyl)-4-Sulfamoyl-Benzamide	|760	0
DB02481	N-Benzylformamide	|125	0
DB02504	[3-(1-Benzyl-3-Carbamoylmethyl-2-Methyl-1h-Indol-5-Yloxy)-Propyl-]-Phosphonic Acid	|5320	0
DB02507	4-Hydroxy-3-[(1s)-3-Oxo-1-Phenylbutyl]-2h-Chromen-2-One	|1559	0
DB02509	Farnesol	|4129	0
DB02512	1,6-Fructose Diphosphate (Linear Form)	|226	0
DB02530	Gamma(Amino)-Butyric Acid	|2628	0
DB02535	Aminodi(Ethyloxy)Ethylaminocarbonylbenzenesulfonamide	|760	0
DB02539	S-Ethylisothiourea	|4843	0
DB02553	Glutathionylspermidine Disulfide	|2936	0
DB02556	D-Phenylalanine	|883	0
DB01095	Fluvastatin	|3156	0
DB02562	Quinonoid 7,8-Tetrahydrobiopterin	|5053	0
DB02568	Peldesine	|4860	0
DB03169	(S)-Hmg-Coa	|3156	0
DB02594	2'-Deoxycytidine	|1633	0
DB02596	Alpha,Beta-Methyleneadenosine-5'-Triphosphate	|349565	0
DB02602	AL7182	|760	0
DB02610	N-(2,3,4,5,6-Pentaflouro-Benzyl)-4-Sulfamoyl-Benzamide	|760	0
DB04377	3-Hydroxy-3-Methyl-Glutaric Acid	|3156	0
DB02624	Homoserine Lactone	|6548	0
DB02631	5-Chloro-6-[(2-Iminopyrrolidin-1-Yl)Methyl]Pyrimidine-2,4(1h,3h)-Dione	|1890	0
DB02635	N-[O-Phosphono-Pyridoxyl]-Isoleucine	|587	0
DB02648	(3-Carboxy-2-(R)-Hydroxy-Propyl)-Trimethyl-Ammonium	|1384	0
DB02659	Cholic Acid	|2235	0
DB02660	Filaminast	|5142	0
DB02679	Cyanamide	|760	0
DB02687	Beta-D-Mannose	|1178	0
DB02692	(6r,1'r,2's)-5,6,7,8 Tetrahydrobiopterin	|4843|4846|5053	0
DB02709	Resveratrol	|5743|5742	0
DB02712	Sorbinil	|231	0
DB02721	4-Iodopyrazole	|124|125	0
DB02726	2-Phosphoglycolic Acid	|5313	0
DB02735	2-Amino-3-Oxo-4-Sulfo-Butyric Acid	|412	0
DB02737	Oxalate Ion	|4200	0
DB02742	Kifunensine	|11253	0
DB04447	1,4-Dithiothreitol	|3156|2954	0
DB02789	Pregnenolone	|6820	0
DB02813	2-Acetamido-2-Deoxy-D-Glucono-1,5-Lactone	|3074	0
DB02820	1-Azepan-1-Yl-2-Phenyl-2-(4-Thioxo-1,4-Dihydro-Pyrazolo[3,4-D]Pyrimidin-5-Yl)Ethanone Adduct	|3028	0
DB02821	Canaline	|4942	0
DB02831	Dihydrogenphosphate Ion	|51181	0
DB02834	IDD552	|231	0
DB02854	Aetiocholanolone	|6822	0
DB02857	Guanosine	|4860	0
DB02861	4-(Aminosulfonyl)-N-[(3,4,5-Trifluorophenyl)Methyl]-Benzamide	|760	0
DB02866	Dansylamide	|760	0
DB02878	3-(2-Aminoethyl)-4-(Aminomethyl)Heptanedioic Acid	|210	0
DB02889	4-O-(4,6-Dideoxy-4-{[4,5,6-Trihydroxy-3-(Hydroxymethyl)Cyclohex-2-En-1-Yl]Amino}-Beta-D-Lyxo-Hexopyranosyl)-Alpha-D-Erythro-Hexopyranose	|279	0
DB02894	Sulfamic Acid 2,3-O-(1-Methylethylidene)-4,5-O-Sulfonyl-Beta-Fructopyranose Ester	|760	0
DB02895	3-(Prop-2-Ene-1-Sulfinyl)-Propene-1-Thiol	|2936	0
DB02901	Dihydrotestosterone	|3292	0
DB02902	3'-Phosphate-Adenosine-5'-Phosphate Sulfate	|6783	0
DB02910	Octanoyl-Coenzyme A	|1632|34	0
DB01992	Coenzyme A	|3156|39	0
DB02925	Piretanide	|6557	0
DB02930	Phosphothiophosphoric Acid-Adenylate Ester	|5207	0
DB02933	5'-Deoxy-5'-(Methylthio)-Tubercidin	|4507	0
DB02936	4-(1-Benzyl-3-Carbamoylmethyl-2-Methyl-1h-Indol-5-Yloxy)-Butyric Acid	|5320	0
DB02939	[(1e)-4-Phenylbut-1-Enyl]Benzene	|4129	0
DB02944	Alpha-D-Mannose	|2990|2717	0
DB02967	N-Ethylmaleimide	|1178	0
DB02983	Para-Mercury-Benzenesulfonic Acid	|1178	0
DB02986	N-(2-Thienylmethyl)-2,5-Thiophenedisulfonamide	|760	0
DB02994	Hydroxydimethylarsine Oxide	|231	0
DB03014	Heme	|4843|6821|1558|4846|875|3162|847|1559|1576	0
DB03017	Lauric Acid	|128	0
DB03039	4-(Aminosulfonyl)-N-[(2,5-Difluorophenyl)Methyl]-Benzamide	|760	0
DB03041	Udp-Glucuronic Acid	|26229	0
DB03042	5-Phosphoarabinonic Acid	|2821	0
DB03052	Dazoxiben	|6916|6916	0
DB03055	Ester	|3615	0
DB03059	Acetoacetyl-Coenzyme A	|3033	0
DB00993	Azathioprine	|3615|5471|2766|3614|51292|271|8833|272|270|158|3251	0
DB03070	Selenazole-4-Carboxyamide-Adenine Dinucleotide	|3615	0
DB03085	Hydroxyacetic Acid	|2539	0
DB03088	Pyroglutamic Acid	|279|276	0
DB03092	5-Hydroxymethyl-Chonduritol	|279|276	0
DB03095	Tetramethylammonium Ion	|2582	0
DB03100	6-Nitroindazole	|4846	0
DB00636	Clofibrate	|4023	0
DB03109	N-Acetyl-D-Allosamine	|1118	0
DB03121	1-Benzyl-5-Methoxy-2-Methyl-1h-Indol-3-Yl)-Acetic Acid	|5320	0
DB02016	R048-8071	|4047	0
DB03130	S-P-Nitrobenzyloxycarbonylglutathione	|2739	0
DB03563	Tetradecane	|4047	0
DB03144	N-Omega-Hydroxy-L-Arginine	|4846	0
DB03147	Flavin-Adenine Dinucleotide	|4129|34|27034|3712|2936|2639	0
DB03150	2',3'-Dideoxythymidine-5'-Monophosphate	|1841	0
DB03166	Acetic Acid	|4048|27034|771|587	0
DB03696	Lanosterol	|4047	0
DB03185	1-Beta-Ribofuranosyl-1,3-Diazepinone	|978	0
DB03195	Phosphoric Acid Mono-[3-Fluoro-5-(5-Methyl-2,4-Dioxo-3,4-Dihydro-2h-Pyrimidin-1-Yl)-Tetrahyro-Furan-2-Ylmethyl] Ester	|1841	0
DB03206	1-Deoxynojirimycin	|11253	0
DB03216	(1'r,2's)-9-(2-Hydroxy-3'-Keto-Cyclopenten-1-Yl)Adenine	|191	0
DB03221	AL7099A	|760	0
DB03227	Nicotinamide Mononucleotide	|349565|64802	0
DB03233	Phosphoric Acid Mono-[3-Amino-5-(5-Methyl-2,4-Dioxo-3,4-Dihydro-2h-Pyrimidin-1-Yl)-Tetrahydro-Furan-2-Ylmethyl] Ester	|1841	0
DB03245	S-4-Nitrobutyryl-Coa	|2639	0
DB03122	B-Octylglucoside	|412|4047	0
DB03262	Al-6619, [2h-Thieno[3,2-E]-1,2-Thiazine-6-Sulfonamide,2-(3-Hydroxyphenyl)-3-(4-Morpholinyl)-, 1,1-Dioxide]	|760	0
DB03265	Inositol-(1,3,4,5)-Tetrakisphosphate	|3706	0
DB03267	1-Allyl-3-Butyl-8-(N-Acetyl-4-Aminobenzyl)-Xanthine	|5105	0
DB03270	2,6-Difluorobenzenesulfonamide	|760	0
DB03271	7,8-Dihydro-L-Biopterin	|7166	0
DB03288	5-Chloro-1h-Indole-2-Carboxylic Acid{[Cyclopentyl-(2-Hydroxy-Ethyl)-Carbamoyl]-Methyl}-Amide	|5836	0
DB03294	1-Methyl-3-Oxo-1,3-Dihydro-Benzo[C]Isothiazole-5-Sulfonic Acid Amide	|760	0
DB03309	N-Cyclohexyltaurine	|6820	0
DB03310	Oxidized Glutathione Disulfide	|2936	0
DB03317	Heme C	|1559	0
DB03330	S-(N-Hydroxy-N-Iodophenylcarbamoyl)Glutathione	|2739	0
DB03333	(4-sulfamoyl-phenyl)-thiocarbamic acid O-(2-thiophen-3-yl-ethyl) ester	|760	0
DB03345	2-Sulfhydryl-Ethanol	|2739|55163	0
DB03346	3,5,3',5'-Tetrachloro-Biphenyl-4,4'-Diol	|6783	0
DB03349	8-Bromo-Adenosine-5'-Monophosphate	|5142	0
DB01700	Aicar	|471	0
DB03366	Imidazole	|4048	0
DB03375	Hydroxyalanine	|262	0
DB03385	4-Methylimidazole	|760	0
DB03394	Heptaethylene Glycol, Peg330	|873	0
DB03397	Uridine-Diphosphate-N-Acetylglucosamine	|2582|6675	0
DB03398	Cysteine Sulfenic Acid	|1787	0
DB03401	D-Myo-Inositol-1,4,5-Triphosphate	|3706	0
DB03403	Cytidine-5'-Monophosphate	|7371	0
DB03413	Deoxyuridine-5'-Diphosphate	|1854	0
DB03424	Bestatin	|4048	0
DB02309	5--Monophosphate-9-Beta-D-Ribofuranosyl Xanthine	|471	0
DB03435	Uridine-5'-Diphosphate	|26229|27087|28	0
DB03439	4,6-Dideoxy-4-Amino-Alpha-D-Glucose	|279|276	0
DB01098	Rosuvastatin	|4846|3156	0
DB03468	1,2,3,4-Tetrahydro-Isoquinoline-7-Sulfonic Acid Amide	|5409	0
DB03471	6-Phenyl-4(R)-(7-Phenyl-Heptanoylamino)-Hexanoic Acid	|5320	0
DB01867	Ethylene Glycol	|5105|2582|3074|7298|217|1118|2717|27034|6783|759	0
DB03486	Phosphomethylphosphonic Acid Guanosyl Ester	|124583	0
DB03495	4,6-Dideoxy-4-{[4,5,6-Trihydroxy-3-(Hydroxymethyl)Cyclohex-2-En-1-Yl]Amino}-Alpha-D-Lyxo-Hexopyranosyl-(1->4)-Alpha-D-Threo-Hexopyranosyl-(1->6)-Alpha-L-Threo-Hexopyranose	|279	0
DB03499	Malate Ion	|4200	0
DB03501	Uridine Diphosphate Galactose	|2582|28	0
DB03519	2-Amino-Pentanoic Acid	|5009	0
DB03526	AL5927	|760	0
DB03539	2-(Acetylamino)-2-Deoxy-6-O-Methyl-Alpha-D-Allopyranose	|1118	0
DB03542	L-Myo-Inositol-1-Phosphate	|3612	0
DB04530	S,S-(2-Hydroxyethyl)Thiocysteine	|5142|7298|5153	0
DB03551	4'-Deaza-1'-Aza-2'-Deoxy-1'-(9-Methylene)-Immucillin-H, (3r,4r)-N-[9-Deazahypoxanthin-9-Yl)Methyl]-4-Hydroxymethyl-Pyrrolidin-3-Ol	|4860	0
DB03556	2-(2-{2-[2-(2-{2-[2-(2-Ethoxy-Ethoxy)-Ethoxy]-Ethoxy}-Ethoxy)-Ethoxy]-Ethoxy}-Ethoxy)-Ethanol, Polyethyleneglycol Peg400	|873	0
DB01393	Bezafibrate	|53354|3156	0
DB03589	Alpha-Ketomalonic Acid	|4200	0
DB03594	1,2,4-Triazole	|760	0
DB03596	N-[2-(1h-Indol-5-Yl)-Butyl]-4-Sulfamoyl-Benzamide	|760	0
DB03597	Gamma-Glutamyl[S-(2-Iodobenzyl)Cysteinyl]Glycine	|5152|8654	0
DB03598	Al-6629, [2h-Thieno[3,2-E]-1,2-Thiazine-6-Sulfonamide,2-(3-Methoxyphenyl)-3-(4-Morpholinyl)-, 1,1-Dioxide]	|760	0
DB03602	S-Benzyl-Glutathione	|2739	0
DB03606	(S)-Rolipram	|5144|5142	0
DB03609	3-Deoxyguanosine	|4860	0
DB03612	3-Hydroxybutyryl-Coenzyme A	|3033	0
DB03615	Ribostamycin	|5034	0
DB03620	5alpha-Androstan-3,17-Dione	|3292	0
DB03632	Argifin	|1118	0
DB03666	3'-Azido-3'-Deoxythymidine-5'-Monophosphate	|1841	0
DB03673	Beta(2-Thienyl)Alanine	|5053	0
DB03674	Methyl Mercury Ion	|760	0
DB03680	Tartronate	|4200	0
DB03684	2-Methyl-2,4-Pentanediol	|5836|4846|8399	0
DB01094	Hesperetin	|6646	0
DB00973	Ezetimibe	|6646|290	0
DB03697	4-Sulfonamide-[1-(4-Aminobutane)]Benzamide	|760	0
DB03703	Cyclohexanol	|125	0
DB03704	12-Hydroxydodecanoic Acid	|128	0
DB03725	Phosphomethylphosphonic Acid-Guanylate Ester	|5105	0
DB03727	Coproporphyrin I	|7389	0
DB03731	S-2-(Boronoethyl)-L-Cysteine	|384	0
DB03740	2-(Acetylamino)-2-Deoxy-a-D-Glucopyranose	|2629	0
DB03743	1,4-Dideoxy-4-Aza-1-(S)-(9-Deazahypoxanthin-9-Yl)-D-Ribitol	|4860	0
DB03744	Cp403700, (S)-1-{2-[(5-Chloro-1h-Indole-2-Carbonyl)-Amino]-3-Phenyl-Propionyl}-Azetidine-3-Carboxylate	|5836	0
DB03747	3ar,5r,6s,7r,7ar-5-Hydroxymethyl-2-Methyl-5,6,7,7a-Tetrahydro-3ah-Pyrano[3,2-D]Thiazole-6,7-Diol	|3074	0
DB03754	Tris(Hydroxymethyl)Aminomethane	|262|124583	0
DB03772	2-Hexyloxy-6-Hydroxymethyl-Tetrahydro-Pyran-3,5-Diol	|28	0
DB03773	6-Deoxy-Alpha-D-Glucose	|279	0
DB03783	Phenacetin	|5742	0
DB03796	Palmitic Acid	|1558	0
DB00735	Naftifine	|6713	0
DB00857	Terbinafine	|6713	0
DB03807	1-(2-Chlorophenyl)-3,5-Dimethyl-1h-Pyrazole-4-Carboxylic Acid Ethyl Ester	|5142	0
DB03814	2-(N-Morpholino)-Ethanesulfonic Acid	|3290	0
DB03821	2-Amino-3-Hydroxy-3-Phosphonooxy-Propionic Acid	|410	0
DB03824	7-Iodo-1,2,3,4-Tetrahydro-Isoquinoline	|5409	0
DB03844	N-(2,6-Diflouro-Benzyl)-4-Sulfamoyl-Benzamide	|760	0
DB03845	P1-(5'-Adenosyl)P5-(5'-(3'azido-3'-Deoxythymidyl))Pentaphosphate	|1841	0
DB03849	Cis-4-Cyano-4-[3-(Cyclopentyloxy)-4-Methoxyphenyl]Cyclohexanecarboxylic Acid	|5142	0
DB03861	(2r,3r,4s,5r)-2-Acetamido-3,4-Dihydroxy-5-Hydroxymethyl-Piperidinium	|3074	0
DB03867	Meta-Nitro-Tyrosine	|2936	0
DB03877	AL4623	|760	0
DB03881	MT-Immucillin-H	|4860	0
DB03889	S-(N-Hydroxy-N-Bromophenylcarbamoyl)Glutathione	|3029	0
DB03894	N-Propargyl-1(S)-Aminoindan	|4129	0
DB03904	Urea	|760	0
DB03906	2-Phenylheme	|3162	0
DB03937	Erythose-4-Phosphate	|2821	0
DB03940	Oxamic Acid	|3939|3945	0
DB03948	6-Chloropurine Riboside, 5'-Monophosphate	|3615|3614	0
DB03950	(S)-N-(3-Indol-1-Yl-2-Methyl-Propyl)-4-Sulfamoyl-Benzamide	|760	0
DB03951	16g	|10007	0
DB03959	N,O6-Disulfo-Glucosamine	|9955	0
DB03965	Fucose	|28|2717	0
DB03971	Acarbose Derived Hexasaccharide	|279	0
DB03975	Mercuribenzoic Acid	|760	0
DB03981	1,4-Dideoxy-5-Dehydro-O2-Sulfo-Glucuronic Acid	|9955	0
DB03991	2-Deoxy-2,3-Dehydro-N-Acetyl-Neuraminic Acid	|4759	0
DB04002	4-Sulfonamide-[4-(Thiomethylaminobutane)]Benzamide	|760	0
DB04005	Uridine 5'-Triphosphate	|7371	0
DB04036	Coenzyme a Persulfide	|3712	0
DB04048	N-Carbamoyl-Alanine	|7001	0
DB04065	N-Cyclopentyl-N-Cyclobutylformamide	|124	0
DB04074	Alpha-ketoisovalerate	|587	0
DB04077	Glycerol	|1787	0
DB04081	(4s-Trans)-4-(Methylamino)-5,6-Dihydro-6-Methyl-4h-Thieno(2,3-B)Thiopyran-2-Sulfonamide-7,7-Dioxide	|760	0
DB04083	N'-Pyridoxyl-Lysine-5'-Monophosphate	|4953|883|189	0
DB04089	AL5300	|760	0
DB04099	Deamido-Nad+	|64802|349565	0
DB04105	N-Heptylformamide	|125	0
DB01091	Butenafine	|6713	0
DB04112	1-Octadecyl-2-Acetamido-2-Deoxy-Sn-Glycerol-3-Phosphoethylmethyl Sulfide	|5320	0
DB04132	S-Hexylglutathione	|2739	0
DB04141	2-Hexyloxy-6-Hydroxymethyl-Tetrahydro-Pyran-3,4,5-Triol	|28	0
DB04147	Lauryl Dimethylamine-N-Oxide	|4129	0
DB04149	(R)-Rolipram	|5144|5142	0
DB04153	S-Hydroxymethyl Glutathione	|128	0
DB04180	4-(Aminosulfonyl)-N-[(2,4-Difluorophenyl)Methyl]-Benzamide	|760	0
DB04106	Fotemustine	|7296	0
DB04185	Norvaline	|2628	0
DB04203	3-Mercuri-4-Aminobenzenesulfonamide	|760	0
DB04237	Tris(Hydroxyethyl)Aminomethane	|276	0
DB04272	Citric Acid	|7371|635|231|9955|27232|8654	0
DB04273	8,9-Dichloro-2,3,4,5-Tetrahydro-1h-Benzo[C]Azepine	|5409	0
DB04287	(S)-5-(4-Benzyloxy-Phenyl)-4-(7-Phenyl-Heptanoylamino)-Pentanoic Acid	|5320	0
DB04307	5-Hydroxy-N-Propargyl-1(R)-Aminoindan	|4129	0
DB04315	Guanosine-5'-Diphosphate	|2762|4831	0
DB04322	LY249543	|4522	0
DB04334	6-hydroxydopa quinone	|8639	0
DB04345	7,8-dimethylalloxazine	|645	0
DB04350	Argadin	|1118	0
DB04352	[(2r,3s,4s,5r)-3,4,5-Trihydroxytetrahydrofuran-2-Yl]Methyl Dihydrogen Phosphate	|53343	0
DB04355	Uridine-5'-Monophosphate Glucopyranosyl-Monophosphateester	|2582	0
DB04363	Mesobiliverdin Iv Alpha	|645	0
DB04371	AL6528	|760	0
DB00322	Floxuridine	|7298	0
DB04381	Crotonaldehyde	|217	0
DB04394	3-Nitro-4-(2-Oxo-Pyrrolidin-1-Yl)-Benzenesulfonamide	|760	0
DB04395	Phosphoaminophosphonic Acid-Adenylate Ester	|3098|1841|3706|2584	0
DB04399	Cacodylate Ion	|131|3029	0
DB04400	7,8-dihydrobiopterin	|5053	0
DB04402	2-Propanol, Isopropanol	|4846	0
DB04404	Allosamizoline	|1118	0
DB04417	P-Nitrophenol	|6817	0
DB04419	Norleucine	|5053	0
DB04445	Mercury Diiodide	|6822	0
DB00432	Trifluridine	|7298	0
DB04453	4-O-(4,6-Dideoxy-4-{[4-[(4-O-Hexopyranosylhexopyranosyl)Oxy]-5,6-Dihydroxy-3-(Hydroxymethyl)Cyclohex-2-En-1-Yl]Amino}Hexopyranosyl)Hexopyranose	|279	0
DB04454	Alpha-Aminobutyric Acid	|2628	0
DB04461	Coproporphyrin Iii	|7389	0
DB04463	3-(4-Amino-1-Tert-Butyl-1h-Pyrazolo[3,4-D]Pyrimidin-3-Yl)Phenol	|873	0
DB04478	Cp-166572, 2-Hydroxymethyl-4-(4-N,N-Dimethylaminosulfonyl-1-Piperazino)-Pyrimidine	|6652	0
DB04507	(4s-Trans)-4-(Ethylamino)-5,6-Dihydro-6-Methyl-4h-Thieno(2,3-B)Thiopyran-2-Sulfonamide-7,7-Dioxide	|760	0
DB04522	Phosphonoserine	|5836	0
DB00650	Leucovorin	|7298	0
DB04534	5-Nitroindazole	|4846	0
DB04549	4-(Aminosulfonyl)-N-[(2,3,4-Trifluorophenyl)Methyl]-Benzamide	|760	0
DB04551	Fructose-1,6-Diphosphate	|5313	0
DB03800	Dump	|7298	0
DB04594	3-hydroxyglutaric acid	|3155	0
DB04600	4-[(3-BROMO-4-O-SULFAMOYLBENZYL)(4-CYANOPHENYL)AMINO]-4H-[1,2,4]-TRIAZOLE	|760	0
DB04601	4-[(4-O-SULFAMOYLBENZYL)(4-CYANOPHENYL)AMINO]-4H-[1,2,4]-TRIAZOLE	|760	0
DB04618	4,6-DIDEOXY-4-{[4-[(4-O-HEXOPYRANOSYLHEXOPYRANOSYL)OXY]-5,6-DIHYDROXY-3-(HYDROXYMETHYL)CYCLOHEX-2-EN-1-YL]AMINO}HEXOPYRANOSYL-(1->4)HEXOPYRANOSYL-(1->4)HEXOPYRANOSE	|279	0
DB04633	N-ethyl-N-[3-(propylamino)propyl]propane-1,3-diamine	|6303	0
DB01117	Atovaquone	|7384|4519|1723	0
DB04655	METOPRINE, METHODICHLOROPHEN	|3176	0
DB04665	2H-1-BENZOPYRAN-2-ONE	|1548	0
DB04672	cyclic 3',5'-thymidine monophosphate	|56953	0
DB04677	N-METHYL-N-[(1R)-1-METHYL-2-PHENYLETHYL]PROP-2-EN-1-AMINE	|4129	0
DB04678	H TYPE II TRISACCHARIDE	|28	0
DB04679	H TYPE I TRISACCHARIDE	|28	0
DB04680	GALACTOSE GREASE	|28|28	0
DB04681	BETA-METHYLLACTOSIDE	|28	0
DB03431	Adenosine-5'-Diphosphate	|9061|3098|2746|55312|3706|1633|4830|2937|7371|1841|3156	0
DB04743	Nimesulide	|5743	0
DB04763	1-N-(4-SULFAMOYLPHENYL-ETHYL)-2,4,6-TRIMETHYLPYRIDINIUM	|760	0
DB04769	5-QUINOXALIN-6-YLMETHYLENE-THIAZOLIDINE-2,4-DIONE	|5294	0
DB04789	5-methyltetrahydrofolate	|275	0
DB04803	Verdoheme	|3162	0
DB04817	Dipyrone	|5742	0
DB04832	Zimelidine	|6532	0
DB04836	Amineptine	|6532|6530	0
DB04840	Debrisoquin	|6530	0
DB04844	Tetrabenazine	|6571	0
DB04878	Voglibose	|8972	0
DB04880	Enoximone	|5139	0
DB04896	Milnacipran	|6530|6532	0
DB04899	Nesiritide	|4882|4881	0
DB06196	Icatibant	|290	0
DB06262	Droxidopa	|6530|5053	0
DB06267	Udenafil	|8654	0
