# Supplementary material for: Reconstruction of a generic metabolic network model of cancer cells
Source: Royal Society of Chemistry journal article supplement (doi:10.1039/c4mb00300d), 2014-09-08
Supplement: c4mb00300d3.xlsx [file c4mb00300d3.xlsx]

## Sheet: TSG lists
Genes number in Models	Genes Ids in models
727	31.1
441	231.1
487	246.1
491	249.1
814	383.1
1610	771.1
1609	768.1
278	1594.1
328	1786.1
339	1789.1
1699	84444.1
372	2023.1
395	2131.1
396	2132.1
400	2137.1
430	2271.1
611	27232.1
659	2878.1
765	3417.1
1777	8821.1
849	4190.1
876	4507.1
882	4524.1
1020	51079.1
944	4830.1
951	4843.1
747	318.1
1177	5289.1
1179	5290.1
1205	5333.1
1028	51196.1
1293	5625.1
1320	5728.1
1867	9536.1
1327	5743.1
1368	6240.1
1377	6390.1
1380	6392.1
1447	6521.1
286	160728
1517	6648.1
1637	7991.1
1592	7378.1
1601	7498.1
351	1811.1
398	2134.1
399	2135.1
670	2944.1
983	5048.1
1067	51478.1
1197	5320.1
1202	5331.1
1376	6389.1
1738	8611.1
1782	8854.1
180	125.1
183	126.1
401	216.1
1743	8639.1
211	1346.1
1018	5105.1
728	31.2
1611	771.2
340	1789.2
397	2132.2
945	4830.2
952	4843.2
748	318.2
1868	9536.2
1638	7991.2
1593	7378.2
671	2944.2
1739	8611.2
1783	8854.2
729	31.3
341	1789.3
749	318.3
1784	8854.3
730	31.4
342	1789.4
731	31.5

## Sheet: Oncogenes list
Genes number in Models	Genes Ids in models
24	10257.1
1609	768.1
276	1591.1
339	1789.1
1878	957.1
411	2194.1
716	3074.1
800	3704.1
922	4718.1
944	4830.1
982	5034.1
191	128869
1179	5290.1
1182	5294.1
1215	5336.1
1320	5728.1
1327	5743.1
1454	6528.1
1574	7298.1
1690	8399.1
90	10948.1
359	19.1
868	4363.1
9	10057.1
1862	95.1
360	191.1
378	204.1
1340	5832.1
544	262.1
799	366.1
870	440.1
1120	518.1
1614	790.1
1766	875.1
1845	9377.1
182	125965
211	1346.1
241	1503.1
315	1719.1
353	1841.1
372	2023.1
1658	80308.1
456	2348.1
537	2597.1
542	2618.1
576	2673.1
616	2731.1
622	2744.1
606	27165.1
630	2762.1
1780	8833.1
642	2821.1
732	3101.1
736	3145.1
1882	9653.1
766	3418.1
790	3620.1
786	3613.1
823	3945.1
1384	64087.1
72	10797.1
946	4831.1
956	4860.1
109	11164.1
59	10606.1
1080	5152.1
1734	8566.1
1137	5214.1
1148	5230.1
545	26227.1
1033	51268.1
1193	5315.1
1624	7941.1
697	29968.1
1319	5723.1
1338	5831.1
1369	6241.1
434	22929.1
1395	6472.1
68	10723.1
1491	6566.1
1820	9123.1
1502	6576.1
15	10165.1
666	292.1
148	115019
1440	6513.1
1442	6515.1
1444	6518.1
53	10568.1
1581	7355.1
1670	81539.1
1750	8671.1
1793	8884.1
1461	6535.1
1468	6541.1
1667	8140.1
643	28231.1
1514	6611.1
1517	6648.1
1524	6713.1
1525	6715.1
1547	6888.1
1557	7083.1
1562	7167.1
1569	7264.1
1590	7371.1
1592	7378.1
1598	7388.1
340	1789.2
801	3704.2
945	4830.2
10	10057.2
379	204.2
871	440.2
1121	518.2
1659	80308.2
457	2348.2
543	2618.2
607	27165.2
1091	5152.2
1194	5315.2
698	29968.2
1339	5831.2
149	115019
1593	7378.2
341	1789.3
380	204.3
872	440.3
1122	518.3
458	2348.3
1093	5152.3
1195	5315.3
342	1789.4
459	2348.4
1094	5152.4
460	2348.5
1095	5152.5
461	2348.6
1096	5152.6
1097	5152.7
