# Supplementary material for: Reconstruction of a generic metabolic network model of cancer cells
Source: Royal Society of Chemistry journal article supplement (doi:10.1039/c4mb00300d), 2014-09-08
Supplement: c4mb00300d6.xlsx [file c4mb00300d6.xlsx]

## Sheet: Sheet1
Reaction Number in Model	Reaction ID	Reaction Name	Subsystems (Pathway)	Min flux in B2014	Max flux in B2014	Min flux in S2011	Max flux in S2011	Min flux in Recon1	Max flux in recon1
8	'NAIt'	'Na+ / iodide cotransport'	'Transport, Extracellular'	0	1000	0	0	-1000	1000
33	'MALTt1r'	'maltose transport (uniport)'	'Transport, Extracellular'	0	70	0	0	0	70
42	'NDPK1'	'nucleoside-diphosphate kinase (ATP:GDP)'	'Nucleotides'	-1000	1000	-1000	1000	-1000	1000
59	'BTNt3i'	'Biotin transport via sodium symport'	'Transport, Extracellular'	0	467.372	0	0	0	0
73	'24_COMMA_25VITD3Hm'	' 24R-Vitamin D-25-hydroxylase (D3)'	'Vitamin D'	0	19.7612	0	0	0	0
100	'MTHFDm'	'methylenetetrahydrofolate dehydrogenase (NADP), mitochondrial'	'Folate Metabolism'	-1000	1000	-1000	1000	-888.464	1000
104	'FAS100COA'	'fatty acyl-CoA synthase (n-C10:0CoA)'	'Fatty acid elongation'	0	61.5049	0	0	0	0
183	'LPCOXp'	'L-pipecolate oxidase, peroxisomal'	'Lysine Metabolism'	0	19.7323	0	0	0	0
209	'CREATt4_LPAREN_2_RPAREN_r'	'Creatine transport (sodium symport) (2:1)'	'Transport, Extracellular'	-9.97323	10	0	0	0	0
255	'CHSTEROLt'	'cholesterol efflux (ATP depedent)'	'Transport, Extracellular'	0	9.76122	0	0	0	0
279	'PYDXK'	'pyridoxal kinase'	'Vitamin B6 Metabolism'	0	477.372	0	0	10	10
283	'MI3PP'	'myo-inositol 3-phosphatase'	'Inositol Phosphate Metabolism'	0	77.8954	0	0	0	0
287	'ACACt2m'	'Acetoacetate mitochondrial transport via H+ symport'	'Transport, Mitochondrial'	-477.372	713.658	0	0	15	15
302	'PUNP1'	'purine-nucleoside phosphorylase (Adenosine)'	'Nucleotides'	-365.555	260.762	0	0	20	20
314	'FAS80COA_L'	'fatty acyl-CoA synthase (n-C8:0CoA), lumped reaction'	'Fatty acid elongation'	0	77.5908	0	0	0	0
317	'NDPK5'	'nucleoside-diphosphate kinase (ATP:dGDP)'	'Nucleotides'	-1000	1000	-999.983	1000	-1000	1000
318	'PDE4'	' 3'',5''-cyclic-nucleotide phosphodiesterase'	'Nucleotides'	0	233.686	0	0	0	0
319	'MCLOR'	' 3-Mercaptolactate:NAD+ oxidoreductase'	'Cysteine Metabolism'	-24.9558	0	0	0	-19.9588	0
328	'PIPLC'	'phosphatidylinositol phospholipase C'	'Inositol Phosphate Metabolism'	0	155.791	0	0	0	0
353	'PAFHe'	'Platelet-activating factor acetylhydrolase'	'Glycerophospholipid Metabolism'	0	10	0	0	0	0
358	'METLEUex'	'Methionine/Leucine exchange (Met in)'	'Transport, Extracellular'	0	1000	0	999.941	0	1000
360	'KCC2t'	'K+-Cl- cotransporter (NH4+)'	'Transport, Extracellular'	-1000	1000	-999.943	0	-1000	1000
369	'TRIODTHYt'	'T3 transport via bicarbonate countertransport'	'Transport, Extracellular'	-1000	1000	0	0	-1000	1000
372	'MANt1r'	'mannose transport (uniport)'	'Transport, Extracellular'	-1000	1000	0	0	-990	1000
375	'CITtbm'	'citrate transport, mitochondrial'	'Transport, Mitochondrial'	0	0	0	0	0	0
404	'PYNP2r'	'pyrimidine-nucleoside phosphorylase (uracil)'	'Pyrimidine Catabolism'	-225.032	59.573	0	0	38.9896	38.9896
407	'DURIK1'	'deoxyuridine kinase (ATP:Deoxyuridine)'	'Nucleotides'	0	523.985	0	0	49.7411	49.7411
435	'L_DASH_LACtcm'	'L-lactate transport via diffusion (cytosol to mitochondria)'	'Transport, Mitochondrial'	0	0	0	0	798.563	798.563
445	'TALA'	'transaldolase'	'Pentose Phosphate Pathway'	-81.4764	131.241	0.543705	0.543705	46.0913	46.0913
466	'THRt4'	'L-threonine via sodium symport'	'Transport, Extracellular'	0	1000	0.108712	1000	0	1000
475	'UREAtm'	'Urea transport via diffusion'	'Urea cycle/amino group metabolism'	-19.9732	0	0	0	-9.93666	0
514	'MI1PP'	'myo-inositol 1-phosphatase'	'Inositol Phosphate Metabolism'	0	155.791	0	0	0	0
515	'BILDGLCURte'	'bilirubin beta-diglucuronide transport MDR'	'Transport, Extracellular'	0	467.372	0	0	0	0
524	'NP1'	'nucleotide phosphatase'	'NAD Metabolism'	0	10	0	0	0	0
582	'ATPH1e'	'ATP diphosphohydrolase'	'Nucleotides'	0	10	0	0	0	0
585	'GLNt4'	'L-glutamine reversible transport via sodium symport'	'Transport, Extracellular'	0	1000	0	1000	0	1000
586	'PROSTGE2t'	'prostaglandin transport via bicarbonate countertransport'	'Transport, Extracellular'	-1000	1000	0	0	-1000	1000
612	'ACETONEt2m'	'acetone mitochondrial transport via proton symport'	'Transport, Mitochondrial'	-209.265	0	0	0	-352.949	-119.008
664	'NDPK6'	'nucleoside-diphosphate kinase (ATP:dUDP)'	'Nucleotides'	0	1000	0	900.195	0	1000
707	'NDPK7'	'nucleoside-diphosphate kinase (ATP:dCDP)'	'Nucleotides'	-1000	1000	-999.983	1000	-1000	1000
724	'ATPtm'	'ADP/ATP transporter, mitochondrial'	'Transport, Mitochondrial'	0	1000	99.8053	1000	0	1000
756	'NDPK9'	'nucleoside-diphosphate kinase (ATP:IDP)'	'Nucleotides'	-1000	1000	-1000	1000	-1000	1000
762	'GLU5Km'	'glutamate 5-kinase (m)'	'Urea cycle/amino group metabolism'	0	799.915	0	0	455.481	455.481
776	'ALAt4'	'Alanine-Sodium symporter'	'Transport, Extracellular'	0	1000	0	1000	0	1000
794	'L_DASH_LACt2r'	'L-lactate reversible transport via proton symport'	'Transport, Extracellular'	-1000	1000	0	0	-990	1000
825	'5MTHFt'	' 5-Methyltetrahydrofolate transport via receptor binding and protolysis'	'Transport, Extracellular'	-50	1000	0	0	0	1000
839	'AHC'	'adenosylhomocysteinase'	'Methionine Metabolism'	0	19.9464	0	0	0	0
842	'GCCam'	'glycine-cleavage complex (lipoylprotein), mitochondrial'	'Glycine, Serine, and Threonine Metabolism'	0	466.509	0	0	0	101.536
860	'PGI'	'glucose-6-phosphate isomerase'	'Glycolysis/Gluconeogenesis'	-531.69	375.682	-17.3975	-7.39749	-161.469	238.531
893	'CITtam'	'citrate transport, mitochondrial'	'Transport, Mitochondrial'	-523.874	0	0	0	0	0
903	'GLCt1r'	'glucose transport (uniport)'	'Transport, Extracellular'	-1000	1000	-1000	1000	-1000	1000
925	'PUNP3'	'purine-nucleoside phosphorylase (Guanosine)'	'Purine Catabolism'	-85.0309	265.254	0	0	20	20
931	'NDPK4'	'nucleoside-diphosphate kinase (ATP:dTDP)'	'Nucleotides'	-1000	1000	-1000	1000	-1000	1000
932	'NDPK10n'	'nucleoside-diphosphate kinase (ATP:dIDP), nuclear'	'Nucleotides'	-1000	1000	-1000	1000	-1000	1000
955	'GLYt4'	'glycine transport via sodium symport'	'Transport, Extracellular'	0	1000	0	1000	0	1000
1065	'5ADTSTSTERONEGLCte'	'glucuronidated compound transport'	'Transport, Extracellular'	0	10	0	0	0	0
1075	'PGCD'	'phosphoglycerate dehydrogenase'	'Glycine, Serine, and Threonine Metabolism'	0	509.06	0	2.86397	63.9762	73.9762
1078	'GAPD'	'glyceraldehyde-3-phosphate dehydrogenase'	'Glycolysis/Gluconeogenesis'	174.177	1000	-12.1804	-12.1804	1000	1000
1083	'NACHEX27ly'	'beta-N-acetylhexosaminidase, lysosomal'	'Hyaluronan Metabolism'	0	49.8245	0	0	0	0
1090	'NDPK1n'	'nucleoside-diphosphate kinase (ATP:GDP), nuclear'	'Nucleotides'	-1000	1000	-1000	1000	-1000	1000
1092	'PROSTGE1t3'	'prostaglandine E1 transport (ATP-dependent)'	'Transport, Extracellular'	0	467.372	0	0	0	0
1094	'PFK'	'phosphofructokinase'	'Glycolysis/Gluconeogenesis'	0	921.394	0	0	31.9544	451.954
1106	'CGMPt'	'cGMP transport (ATP-dependent)'	'Transport, Extracellular'	0	89.1204	0	0	0	0
1128	'ARGtiDF'	'L-arginine transport via diffusion (extracellular to cytosol)'	'Transport, Extracellular'	0	10	0	10	0	10
1180	'LDH_L'	'L-lactate dehydrogenase'	'Glycolysis/Gluconeogenesis'	-1000	243.686	0	0	-788.563	-788.563
1188	'ENO'	'enolase'	'Glycolysis/Gluconeogenesis'	11.6138	1000	-15.0444	-12.1804	926.024	936.024
1194	'PUNP5'	'purine-nucleoside phosphorylase (Inosine)'	'Purine Catabolism'	-99.7742	277.486	0	0	10	10
1233	'PUNP6'	'purine-nucleoside phosphorylase (Deoxyinosine)'	'Purine Catabolism'	-159.428	89.7742	0	0	10	10
1242	'ESTRADIOLGLCt'	'estradiol glucuronide transport via bicarbonate countertransport'	'Transport, Extracellular'	-10	467.372	0	0	0	0
1264	'FAS120COA'	'fatty-acyl-CoA synthase (n-C12:0CoA)'	'Fatty acid elongation'	0	61.5049	0	0	0	0
1279	'MTHFCm'	'methenyltetrahydrifikate cyclohydrolase, mitochondrial'	'Folate Metabolism'	0	476.509	0	0	111.536	111.536
1280	'PGSr'	'Prostaglandin G/H synthase'	'Eicosanoid Metabolism'	0	18.3333	0	0	0	0
1298	'NDPK8'	'nucleoside-diphosphate kinase (ATP:dADP)'	'Nucleotides'	-1000	1000	-1000	900.183	-1000	1000
1301	'FRUt1r'	'D-fructose transport in via uniport'	'Transport, Extracellular'	-1000	1000	0	0	-980	1000
1308	'ESTRONESt'	'estrone 3-sulfate transport via bicarbonate countertransport'	'Transport, Extracellular'	-1000	10	0	0	-1000	0
1331	'NAt'	'sodium transport (uniport)'	'Transport, Extracellular'	-1000	1000	-1000	0	-1000	1000
1356	'PUNP4'	'purine-nucleoside phosphorylase (Deoxyguanosine)'	'Purine Catabolism'	-114.771	237.124	0	0	9.89643	9.89643
1362	'PLA2_2e'	'phospholipase A2'	'Glycerophospholipid Metabolism'	0	49.3803	0	0	0	0
1389	'PYRt2r'	'pyruvate reversible transport via proton symport'	'Transport, Extracellular'	-1000	10	0	0	-691.823	10
1390	'NDPK6n'	'nucleoside-diphosphate kinase (ATP:dUDP), nuclear'	'Nucleotides'	0	229.228	0	0	0	0
1394	'GMPS2'	'GMP synthase'	'Nucleotides'	0	156.538	0.063902	0.063902	0	0
1398	'GCC2bim'	'glycine-cleavage system (lipoamide) irreversible, mitochondrial'	'Glycine, Serine, and Threonine Metabolism'	0	466.509	0	0	0	101.536
1416	'H2CO3D'	'carboxylic acid dissociation'	'Miscellaneous'	-10	523.241	11.8315	29.3612	-10	-10
1438	'PIK3'	'phosphatidylinositol 3-kinase'	'Inositol Phosphate Metabolism'	0	467.372	0	0	0	0
1494	'CYTDK1'	'cytidine kinase (ATP)'	'Nucleotides'	0	487.372	0	0	0.631499	0.631499
1503	'ACACt2'	'acetoacetate transport via proton symport'	'Transport, Extracellular'	-184.469	10	0	0	10	10
1541	'TPI'	'triose-phosphate isomerase'	'Glycolysis/Gluconeogenesis'	-39.9087	725.181	-6.41404	-6.41404	481.954	481.954
1568	'MTHFD2m'	'methylenetetrahydrofolate dehydrogenase (NAD), mitochondrial'	'Folate Metabolism'	-1000	1000	-1000	1000	-888.464	1000
1580	'FAS160COA'	'fatty-acyl-CoA synthase (n-C16:0CoA)'	'Fatty acid elongation'	0	60.1106	0	0	0	0
1602	'KCCt'	'K+-Cl- cotransport'	'Transport, Extracellular'	-1000	1000	-992.344	1000	-1000	1000
1609	'GCC2cm'	'glycine-cleavage complex (lipoamide), mitochondrial'	'Glycine, Serine, and Threonine Metabolism'	0	466.509	0	0	0	101.536
1685	'METt4'	'L-methionine transport in via sodium symport'	'Transport, Extracellular'	0	1000	0	1000	0	1000
1731	'PYDAMK'	'pyridoxamine kinase'	'Vitamin B6 Metabolism'	0	467.372	0	0	0	0
1756	'RNDR4'	'ribonucleoside-diphosphate reductase (UDP)'	'Nucleotides'	0	264.483	0	0	0	0
1778	'PROSTGE2t3'	'prostaglandine E2 transport (ATP-dependent)'	'Transport, Extracellular'	0	467.372	0	0	0	0
1781	'HEX4'	'hexokinase (D-mannose:ATP)'	'Fructose and Mannose Metabolism'	0	100	0	0	37.0804	37.0804
1789	'PNP'	'purine-nucleoside phosphorylase'	'NAD Metabolism'	-155.791	0	0	0	0	0
1797	'AHEXASEly'	'beta-N-acetylhexosaminidase, lysosomal'	'N-Glycan Degradation'	0	20	0	0	9.02681	9.02681
1807	'FOLR2'	'folate reductase'	'Folate Metabolism'	0	10	0	0	0	0
1822	'ADK1m'	'adenylate kinase, mitochondrial'	'Nucleotides'	-1000	1000	-1000	1000	-1000	1000
1853	'BUTt2m'	'Butyrate mitochondrial transport via proton symport, reversible'	'Transport, Mitochondrial'	0	10	0	0	0	0
1907	'GALt1r'	'galactose transport (uniport)'	'Transport, Extracellular'	-1000	1000	0	0	-1000	1000
1916	'CLHCOtex'	'chloride transport via bicarbonate countertransport'	'Transport, Extracellular'	0	1000	0	0	0	1000
1970	'NDP8'	'nucleoside-diphosphatase (dUDP)'	'Nucleotides'	0	264.483	0	0	0	0
1984	'PYDXNK'	'pyridoxine kinase'	'Vitamin B6 Metabolism'	0	472.372	0	0	0	0
1995	'ASPGLUm'	'aspartate-glutamate mitochondrial shuttle'	'Transport, Mitochondrial'	0	994.853	0	0	0	0
2011	'PGK'	'phosphoglycerate kinase'	'Glycolysis/Gluconeogenesis'	-1000	-165.883	12.1804	12.1804	-1000	-1000
2012	'PROt4'	'Na+/Proline-L symporter'	'Transport, Extracellular'	0	1000	0	1000	0	1000
2019	'TMDK1'	'thymidine kinase (ATP:thymidine)'	'Nucleotides'	0	479.066	0	0	0.155351	0.155351
2034	'GF6PTA'	'glutamine-fructose-6-phosphate transaminase'	'Aminosugar Metabolism '	0	469.614	0	0	0	0
2036	'GAMt1r'	'glucosamine transport (uniport)'	'Transport, Extracellular'	0	10	0	0	10	10
2044	'TCHOLAt'	'taurocholate transport via bicarbonate countertransport'	'Transport, Extracellular'	-1000	1000	0	0	-1000	1000
2052	'NDPK10'	'nucleoside-diphosphate kinase (ATP:dIDP)'	'Nucleotides'	-1000	1000	-1000	1000	-1000	1000
2054	'CYOR_DASH_u10m'	'ubiquinol-6 cytochrome c reductase, Complex III'	'Oxidative Phosphorylation'	0	91.3706	44.169	44.169	91.3706	91.3706
2062	'P5CRxm'	'pyrroline-5-carboxylate reductase (m)'	'Arginine and Proline Metabolism'	0	508.782	0	0	0	1000
2065	'GLXO1'	'glyoxylate oxidase'	'Glyoxylate and Dicarboxylate Metabolism'	0	82.445	0	0	0	0
2094	'BTNt2'	'Biotin reversible transport via proton symport'	'Transport, Extracellular'	-1000	0	0	0	-1000	0
2097	'NDPK2n'	'nucleoside-diphosphate kinase (ATP:UDP), nuclear'	'Nucleotides'	-1000	1000	-1000	1000	-1000	1000
2103	'AIRCr'	'phosphoribosylaminoimidazole carboxylase'	'IMP Biosynthesis'	0	0	0.105574	0.105574	0	0
2123	'CYSTS'	'cystathionine beta-synthase'	'Methionine Metabolism'	0	9.94644	0	0	0	0
2149	'GARFT'	'phosphoribosylglycinamide formyltransferase'	'IMP Biosynthesis'	0	0	0.105574	0.105574	0	0
2156	'2HCO3_NAt'	'bicarbonate transport (Na/HCO3 1:2 cotransport)'	'Transport, Extracellular'	-1000	1000	-514.631	0	-1000	1000
2187	'ACETONEt2'	'acetone transport via proton symport'	'Transport, Extracellular'	-209.265	10	0	0	-352.949	-119.008
2218	'FAS140COA'	'fatty-acyl-CoA synthase (n-C14:0CoA)'	'Fatty acid elongation'	0	61.5049	0	0	0	0
2323	'ATPH2e'	'ATP diphosphohydrolase'	'Nucleotides'	0	10	0	0	0	0
2325	'GCCcm'	'glycine-cleavage complex (lipoylprotein), mitochondrial'	'Glycine, Serine, and Threonine Metabolism'	0	466.509	0	0	0	101.536
2337	'NDPK5n'	'nucleoside-diphosphate kinase (ATP:dGDP), nuclear'	'Nucleotides'	-1000	1000	-1000	1000	-1000	1000
2344	'NDPK7n'	'nucleoside-diphosphate kinase (ATP:dCDP), nuclear'	'Nucleotides'	-1000	1000	-1000	1000	-1000	1000
2368	'HPYRR2x'	'hydroxypyruvate reductase (NADH)'	'Glyoxylate and Dicarboxylate Metabolism'	0	90	0	0	0	0
2428	'PYRt2p'	'pyruvate peroxisomal transport via proton symport'	'D-alanine metabolism'	-90	0	0	0	0	0
2451	'ESTRADIOLGLCt2'	' 17-beta-D-glucuronide transport (ATP-dependent)'	'Transport, Extracellular'	0	467.372	0	0	0	0
2464	'HEX1'	'hexokinase (D-glucose:ATP)'	'Glycolysis/Gluconeogenesis'	0	867.372	0	10	0	400
2504	'ADPRDP'	'ADPribose diphosphatase'	'Nucleotides'	0	175.791	0	0	20	20
2519	'NDPK3'	'nucleoside-diphosphate kinase (ATP:CDP)'	'Nucleotides'	-1000	1000	-1000	-0.0529474	-1000	1000
2549	'PNTOt5'	'Pantothenate sodium symporter II'	'Transport, Extracellular'	0	8.363	0	0	0	0
2572	'PI4PLC'	'phosphatidylinositol 4-phosphate phospholipase C'	'Inositol Phosphate Metabolism'	0	116.843	0	0	0	0
2577	'HEX7'	'hexokinase (D-fructose:ATP)'	'Fructose and Mannose Metabolism'	0	887.372	0	10	0	420
2596	'LYStiDF'	'L-lysine transport via diffusion (extracellular to cytosol)'	'Transport, Extracellular'	0	1000	0	20	0	1000
2634	'2HBO'	' 2-Hydroxybutyrate:NAD+ oxidoreductase'	'Propanoate Metabolism'	-19.3574	0	0	0	-8.60616	-8.60616
2702	'GLUt2m'	'L-glutamate reversible transport via proton symport, mitochondrial'	'Transport, Mitochondrial'	-871.724	868.509	-7.47917	-7.47917	236.969	236.969
2741	'PDE4n'	' 3'',5''-cyclic-nucleotide phosphodiesterase, Nucleus'	'Nucleotides'	0	233.686	0	0	0	0
2808	'BUTt2r'	'Butyrate transport via proton symport, reversible'	'Transport, Extracellular'	0	10	0	0	0	0
2810	'BILGLCURte'	'bilirubin monoglucuronide transport MDR'	'Transport, Extracellular'	0	467.372	0	0	0	0
2831	'NDPK2'	'nucleoside-diphosphate kinase (ATP:UDP)'	'Nucleotides'	-1000	1000	-1000	15.6312	-1000	1000
2844	'RNDR3'	'ribonucleoside-diphosphate reductase (CDP)'	'Nucleotides'	0	271.961	0.0201949	0.0201949	0	0
2852	'GCC2am'	'glycine-cleavage complex (lipoamide), mitochondrial'	'Glycine, Serine, and Threonine Metabolism'	0	466.509	0	0	0	101.536
2873	'HMBS'	'hydroxymethylbilane synthase'	'Heme Biosynthesis'	0	8.18182	0	0	0	0
2895	'24_COMMA_25VITD2Hm'	' 24R-Vitamin D-25-hydroxylase (D2)'	'Vitamin D'	0	10	0	0	0	0
2899	'PI45PLC'	'phosphatidylinositol 4,5-bisphosphate phospholipase C'	'Inositol Phosphate Metabolism'	0	93.4744	0	0	0	0
2902	'DHAAt1r'	'dehydroascorbate transport (uniport)'	'Transport, Extracellular'	-10	15	0	0	15	15
2908	'RNDR2'	'ribonucleoside-diphosphate reductase (GDP)'	'Nucleotides'	0	245.845	0.00807825	0.00807825	0	0
2910	'THYOXt'	'T4 transport via bicarbonate countertransport'	'Transport, Extracellular'	-1000	1000	0	0	-1000	1000
2941	'DHFR'	'dihydrofolate reductase'	'Folate Metabolism'	0	109.529	0.0121166	0.0121166	0	0
2951	'PGS'	'Prostaglandin G/H synthase'	'Eicosanoid Metabolism'	0	18.3333	0	0	0	0
2987	'CTPS1'	'CTP synthase (NH3)'	'Nucleotides'	0	294.876	0.0694486	0.0694486	0	0
3038	'PUNP2'	'purine-nucleoside phosphorylase (Deoxyadenosine)'	'Purine Catabolism'	-69.8399	381.36	0	0	10	10
3055	'URIK1'	'uridine kinase (ATP:Uridine)'	'Pyrimidine Biosynthesis'	0.160139	484.146	0	0	0.378942	0.378942
3070	'P5CRm'	'pyrroline-5-carboxylate reductase (m)'	'Arginine and Proline Metabolism'	0	508.782	0	0	0	1000
3123	'2HBt2'	' 2-hydroxybutyrate cotransport with proton'	'Transport, Extracellular'	-19.3574	0	0	0	-8.60616	-8.60616
3164	'KAS8'	'b-ketoacyl synthetase (palmitate, n-C16:0)'	'Fatty acid elongation'	0	46.3429	0	0	0	0
3248	'PSP_L'	'phosphoserine phosphatase (L-serine)'	'Glycine, Serine, and Threonine Metabolism'	0	509.06	0	2.86397	63.9762	73.9762
3267	'G5SDym'	'glutamate-5-semialdehyde dehydrogenase (m)'	'Urea cycle/amino group metabolism'	0	799.915	0	0	455.481	455.481
3271	'GLUNm'	'glutaminase (mitochondrial)'	'Glutamate metabolism'	0	329.943	0	0	39.3432	39.3432
3289	'SO4HCOtex'	'sulfate transport via bicarbonate countertransport'	'Transport, Extracellular'	0	1000	0	0	0	1000
3316	'3HCO3_NAt'	'bicarbonate transport (Na/HCO3 1:3 cotransport)'	'Transport, Extracellular'	-1000	1000	-343.087	0	-1000	1000
3373	'D_DASH_LACt2'	'D-lactate transport via proton symport'	'Transport, Extracellular'	-1000	10	10	10	10	10
3405	'AHEXASE2ly'	'beta-N-acetylhexosaminidase, lysosomal'	'N-Glycan Degradation'	0	10	0	0	0	0
3410	'PSERT'	'phosphoserine transaminase'	'Glycine, Serine, and Threonine Metabolism'	0	509.06	0	2.86397	63.9762	73.9762
3428	'PIt7'	'phosphate transport in/out via three Na+ symporter'	'Transport, Extracellular'	-1000	1000	-999.691	0	-1000	1000
3442	'DTMPK'	'dTMP kinase'	'Nucleotides'	0	95.6824	0	0	0	0
3451	'GCCbim'	'glycine-cleavage complex (lipoylprotein) irreversible, mitochondrial'	'Glycine, Serine, and Threonine Metabolism'	0	466.509	0	0	0	101.536
3461	'CAMPt'	'cAMP transport (ATP-dependent)'	'Transport, Extracellular'	0	79.7742	0	0	0	0
3468	'NDPK4n'	'nucleoside-diphosphate kinase (ATP:dTDP), nuclear'	'Nucleotides'	-1000	1000	-1000	1000	-1000	1000
3474	'NDPK8n'	'nucleoside-diphosphate kinase (ATP:dADP), nuclear'	'Nucleotides'	-1000	1000	-1000	1000	-1000	1000
3488	'PYK'	'pyruvate kinase'	'Glycolysis/Gluconeogenesis'	11.6138	1000	0	2.86397	926.024	936.024
3511	'CYOOm3'	'cytochrome c oxidase, mitochondrial Complex IV'	'Oxidative Phosphorylation'	0	45.6853	22.0845	22.0845	45.6853	45.6853
3554	'FMNAT'	'FMN adenylyltransferase'	'Riboflavin Metabolism'	0	233.686	0	0	0	0
3558	'MI4PP'	'myo-inositol 4-phosphatase'	'Inositol Phosphate Metabolism'	0	116.843	0	0	0	0
3562	'NDPK3n'	'nucleoside-diphosphate kinase (ATP:CDP),nuclear'	'Nucleotides'	-1000	1000	-1000	1000	-1000	1000
3587	'NDPK9n'	'nucleoside-diphosphate kinase (ATP:IDP), nuclear'	'Nucleotides'	-1000	1000	-1000	1000	-1000	1000
3593	'TMDS'	'thymidylate synthase'	'Nucleotides'	0	99.5292	0.0121166	0.0121166	0	0
3633	'HEX10'	'hexokinase (D-glucosamine:ATP)'	'Aminosugar Metabolism '	0	10	0	0	10	10
3635	'RNDR1'	'ribonucleoside-diphosphate reductase (ADP)'	'Nucleotides'	0	409.66	0.0121166	0.0121166	19.6211	19.6211
3638	'SPODMm'	'superoxide dismutase'	'ROS Detoxification'	0	5.45685	5.22085	5.22085	5.45685	5.45685
3701	'FAS180COA'	'fatty-acyl-CoA synthase (n-C18:0CoA)'	'Fatty acid elongation'	0	84.6628	0	0	0	0
3733	'MCCCrm'	'methylcrotonoyl-CoA carboxylase, mitochondrial'	'Valine, Leucine, and Isoleucine Metabolism'	0	9.67871	0	0	0	0
3735	'DURIPP'	'deoxyuridine phosphorylase'	'Nucleotides'	-79.573	229.138	0	0	-39.7411	-39.7411
9	'NDP8ex'	'nucleoside-diphosphatase (UTP), extracellular'	'Nucleotides'	0	10	0	0	0	0
119	'PAFH'	'Platelet-activating factor acetylhydrolase'	'Glycerophospholipid Metabolism'	0	234.688	0	0	0	0
143	'ALOX52'	'Arachidonate 5-lipoxygenase'	'Eicosanoid Metabolism'	0	26	0	0	0	0
159	'ACCOAC'	'acetyl-CoA carboxylase'	'Fatty Acid Metabolism'	0	533.241	0	0	0	0
233	'NAt5'	'sodium/ammonium proton antiporter'	'Transport, Extracellular'	-1000	1000	-999.943	0	-1000	1000
291	'NDP7ex'	'nucleoside-diphosphatase (UDP), extracellular'	'Nucleotides'	0	20	0	0	0	0
390	'NDP3ex'	'nucleoside-diphosphatase (GDP), extracellular'	'Nucleotides'	0	20	0	0	0	0
399	'UGCG'	'Ceramide glucosyltransferase'	'Sphingolipid Metabolism'	0	159.68	0	0	0	0
413	'PCHOLPr_hs'	'choline phosphatase'	'Glycerophospholipid Metabolism'	0	241.078	0	0	0	3.5241
456	'GALt2_2'	'D-galactose transport via proton symport'	'Transport, Extracellular'	-1000	1000	0	0	-1000	1000
701	'FACOAL181i'	'C181 fatty acid activation'	'Fatty acid activation'	0	10	0	0	0	0
705	'NDP10ex'	'nucleoside-diphosphatase (IDP), extracellular'	'Nucleotides'	0	10	0	0	0	0
1044	'DPGase'	'Diphosphoglycerate phosphatase'	'Glycolysis/Gluconeogenesis'	0	467.372	0	0	0	0
1110	'H2Otn'	'H2O transport, nuclear'	'Transport, Nuclear'	-867.258	0	0	0	-197.229	0
1137	'PCHOLPm_hs'	'choline phosphatase'	'Glycerophospholipid Metabolism'	0	9.98215	0	0	0	0
1170	'CHOLK'	'Choline kinase'	'Glycerophospholipid Metabolism'	0	467.372	0	0	0	0
1189	'ALOX5'	'Arachidonate 5-lipoxygenase'	'Eicosanoid Metabolism'	0	26	0	0	0	0
1248	'FACOAL80i'	'fatty-acid--CoA ligase (octanoate)'	'Fatty acid activation'	0	10	0	0	0	0
1417	'ALDD2xm'	'aldehyde dehydrogenase (acetylaldehyde, NAD), mitochondrial'	'Glycolysis/Gluconeogenesis'	0	214.894	0	0	0	0
1423	'GLCt2_2'	'D-glucose transport in via proton symport'	'Transport, Extracellular'	-1000	1000	-1000	1000	-1000	1000
1453	'ACCOACm'	'Acetyl-Coa carboxylase, beta isoform'	'Fatty Acid Metabolism'	0	467.372	0	0	0	0
1488	'FACOAL204i'	'arachidonic acid activation'	'Fatty acid activation'	0	1000	0	0	0	1000
1495	'FACOAL140i'	'fatty-acid--CoA ligase (tetradecanoate)'	'Fatty acid activation'	0	10	0	0	0.889324	0.889324
1623	'TKT2'	'transketolase'	'Pentose Phosphate Pathway'	-81.4764	131.241	0.543705	0.543705	46.0913	46.0913
1629	'PLA2_2'	'phospholipase A2'	'Glycerophospholipid Metabolism'	0	109.082	0.736324	0.736324	0	0
1681	'FACOAL150'	'fatty-acid--CoA ligase'	'Fatty acid activation'	0	10	0	0	0	0
1690	'FACOAL170'	'fatty-acid--CoA ligase'	'Fatty acid activation'	0	10	0	0	0	0
1782	'PGM'	'phosphoglycerate mutase'	'Glycolysis/Gluconeogenesis'	-1000	-11.6138	12.1804	15.0444	-936.024	-926.024
1796	'MOGAT'	'monoacylglycerol acyltransferase'	'Triacylglycerol Synthesis'	0	310.772	0	0	0	0
1810	'HOXG'	'Heme oxygenase 1'	'Heme Degradation'	0	8.18182	0	0	0	0
1820	'FACOAL160i'	'C160 fatty acid activation'	'Fatty acid activation'	0	75.7889	0	0	0	0
1856	'NKCC2t'	'Na+-K+-Cl- cotransport (NH4+)'	'Transport, Extracellular'	-1000	1000	-999.943	0	-1000	1000
1877	'CTPS2'	'CTP synthase (glutamine)'	'Pyrimidine Biosynthesis'	0	197.397	0	0	0	0
1957	'TKT1'	'transketolase'	'Pentose Phosphate Pathway'	-81.4764	131.241	0.543705	0.543705	46.0913	46.0913
1996	'PFK26'	' 6-phosphofructo-2-kinase'	'Fructose and Mannose Metabolism'	0	467.372	0	0	0	0
1999	'GLUCYS'	'gamma-glutamylcysteine synthetase'	'Glutathione Metabolism'	0	199.1	0	0	0	0
2007	'SPHK21c'	'sphingosine kinase 2'	'Sphingolipid Metabolism'	0	467.372	0	0	0	0
2015	'GGNG'	'glycogenin self-glucosylation'	'Starch and Sucrose Metabolism'	7.66524	32.2638	1.41471	1.41471	18.1385	18.1385
2133	'ACITL'	'ATP-Citrate lyase'	'Citric Acid Cycle'	0	533.794	0	0	10	10
2148	'ADNCYC'	'adenylate cyclase'	'Nucleotides'	0	233.686	0	0	0	0
2213	'SLCBK1'	'sphingolipid long chain base kinase (sphinganine)'	'Sphingolipid Metabolism'	0	467.372	0	0	0	0
2214	'SPODMn'	'superoxide dismutase, nuclear'	'ROS Detoxification'	0	5.45685	0	0	0	0
2245	'TRPO2'	'L-Tryptophan:oxygen 2,3-oxidoreductase (decyclizing)'	'Tryptophan metabolism'	0	9.97323	0	0	0	0
2270	'ALATA_L'	'L-alanine transaminase'	'Glutamate metabolism'	-486.758	36.5462	-12.864	-10	-92.825	-57.8662
2307	'FBP26'	'Fructose-2,6-bisphosphate 2-phosphatase'	'Fructose and Mannose Metabolism'	0	467.372	0	0	0	0
2342	'PDE1'	' 3'',5''-cyclic-nucleotide phosphodiesterase'	'Nucleotides'	0	233.686	0	0	0	0
2439	'PCHOLP_hs'	'choline phosphatase'	'Glycerophospholipid Metabolism'	0	241.078	0	0	0	3.5241
2456	'GALt4_2'	'galactose transport via sodium symport'	'Transport, Extracellular'	-1000	1000	0	0	-1000	1000
2483	'SPODMx'	'superoxide dismutase, peroxisome'	'ROS Detoxification'	0	5.45685	0	0	0	0
2632	'SPODM'	'superoxide dismutase'	'ROS Detoxification'	0	5.45685	0	0	0	0
2742	'LGTHL'	'lactoylglutathione lyase'	'Pyruvate Metabolism'	0	1000	0	998.732	0	1000
2959	'PEPCK'	'Phosphoenolpyruvate carboxykinase (GTP)'	'Glycolysis/Gluconeogenesis'	0	0	12.1804	15.0444	0	0
3121	'PGDI'	'Prostaglandin-H2 D-isomerase [Precursor]'	'Eicosanoid Metabolism'	0	18.3333	0	0	0	0
3202	'PI45P3Kn'	'phosphatidylinositol 4,5-bisphosphate 3-kinase, nuclear'	'Inositol Phosphate Metabolism'	0	233.686	0	0	0	0
3203	'UREAt5'	'urea, water cotransport'	'Transport, Extracellular'	-1000	1000	-1000	1000	-1000	210
3338	'GPAM_hs'	'glycerol-3-phosphate acyltransferase'	'Triacylglycerol Synthesis'	0	168.341	0.103959	0.103959	0	0
3427	'G3PD1'	'glycerol-3-phosphate dehydrogenase (NAD)'	'Glycerophospholipid Metabolism'	-280.764	67.1599	-0.103959	-0.103959	20	20
3459	'FACOAL180i'	'C180 fatty acid activation'	'Fatty acid activation'	0	10	0	0	0	0
3512	'GLGNS1'	'glycogen synthase (ggn -> glygn1)'	'Starch and Sucrose Metabolism'	7.66524	32.2638	1.41471	1.41471	18.1385	18.1385
3529	'NTP3e'	'nucleoside-triphosphatase (GTP)'	'Nucleotides'	0	10	0	0	0	0
3580	'NAt3_1'	'sodium proton antiporter (H:NA is 1:1)'	'Transport, Extracellular'	-1000	1000	-1000	0	-1000	1000
3671	'DPGM'	'Diphosphoglyceromutase'	'Glycolysis/Gluconeogenesis'	0	467.372	0	0	0	0
3725	'TCHOLAte'	'bile acid intracellular transport'	'Transport, Extracellular'	-1000	1000	0	0	-1000	1000
1725	'ATPS4m'	'ATP synthase (four protons for one ATP)'	'Oxidative Phosphorylation'	0	303.512	93.7496	93.7496	495.513	495.513
