# Supplementary material for: Reconstruction of a generic metabolic network model of cancer cells
Source: Royal Society of Chemistry journal article supplement (doi:10.1039/c4mb00300d), 2014-09-08
Supplement: c4mb00300d7.xlsx [file c4mb00300d7.xlsx]

## Sheet: Sheet1
Reaction Number in Model	Reaction ID	Reaction name	Subsystems (Pathway)	mean flux in B2014	mean flux in Recon1	mean flux inS2011
33	'MALTt1r'	'maltose transport (uniport)'	'Transport, Extracellular'	350.388	68.0891	0
42	'NDPK1'	'nucleoside-diphosphate kinase (ATP:GDP)'	'Nucleotides'	0.00815791	0	-221.488
59	'BTNt3i'	'Biotin transport via sodium symport'	'Transport, Extracellular'	0.00152845	0	0
73	'24_COMMA_25VITD3Hm'	' 24R-Vitamin D-25-hydroxylase (D3)'	'Vitamin D'	5.37921	0	0
104	'FAS100COA'	fatty acyl-CoA synthase (n-C10:0CoA)'	'Fatty acid elongation'	3.51023	0	0
183	'LPCOXp'	'L-pipecolate oxidase, peroxisomal'	'Lysine Metabolism'	0.000780936	0	0
255	'CHSTEROLt'	'cholesterol efflux (ATP depedent)'	'Transport, Extracellular'	0.00390359	0	0
279	'PYDXK'	'pyridoxal kinase'	'Vitamin B6 Metabolism'	2.45012	0	0
283	'MI3PP'	myo-inositol 3-phosphatase'	Inositol Phosphate Metabolism'	0.0130856	0	0
287	'ACACt2m'	'Acetoacetate mitochondrial transport via H+ symport'	'Transport, Mitochondrial'	0.0107753	0	0
302	'PUNP1'	'purine-nucleoside phosphorylase (Adenosine)'	'Nucleotides'	0.0391825	0	0
318	'PDE4'	' 3'',5''-cyclic-nucleotide phosphodiesterase'	'Nucleotides'	572.972	425.461	0
372	'MANt1r'	'mannose transport (uniport)'	'Transport, Extracellular'	0.0517457	0	0
375	'CITtbm'	'citrate transport, mitochondrial'	'Transport, Mitochondrial'	0.0144644	0	0
404	'PYNP2r'	'pyrimidine-nucleoside phosphorylase (uracil)'	Pyrimidine Catabolism'	0.000652559	0	0
407	'DURIK1'	'deoxyuridine kinase (ATP:Deoxyuridine)'	'Nucleotides'	0.298539	0	0
524	'NP1'	'nucleotide phosphatase'	'NAD Metabolism'	464.124	410.65	0
582	'ATPH1e'	'ATP diphosphohydrolase'	'Nucleotides'	0.136976	0	0
586	'PROSTGE2t'	'prostaglandin transport via bicarbonate countertransport'	'Transport, Extracellular'	129.968	49.5286	0
612	'ACETONEt2m'	'acetone mitochondrial transport via proton symport'	'Transport, Mitochondrial'	742.062	680.061	0
756	'NDPK9'	'nucleoside-diphosphate kinase (ATP:IDP)'	'Nucleotides'	80.486	66.1468	-1.67752
782	'ICDHyrm'	'Isocitrate dehydrogenase (NADP+)'	'Citric Acid Cycle'	0.0191128	0	0
825	'5MTHFt'	' 5-Methyltetrahydrofolate transport via receptor binding and protolysis'	'Transport, Extracellular'	0.00262692	0	0
842	'GCCam'	'glycine-cleavage complex (lipoylprotein), mitochondrial'	Glycine, Serine, and Threonine Metabolism'	12.9394	10	0
893	'CITtam'	'citrate transport, mitochondrial'	'Transport, Mitochondrial'	5.37921	0	0
925	'PUNP3'	'purine-nucleoside phosphorylase (Guanosine)'	'Purine Catabolism'	0.00188548	0	0
931	'NDPK4'	'nucleoside-diphosphate kinase (ATP:dTDP)'	'Nucleotides'	569.567	437.074	-106.437
962	'PRAGSr'	'phosphoribosylglycinamide synthase'	IMP Biosynthesis'	0.624615	0	0.105574
1065	'5ADTSTSTERONEGLCte'	'glucuronidated compound transport'	'Transport, Extracellular'	0.0229578	0	0
1075	'PGCD'	'phosphoglycerate dehydrogenase'	'Glycine, Serine, and Threonine Metabolism'	43.4963	43.1809	0.190641
1083	'NACHEX27ly'	'beta-N-acetylhexosaminidase, lysosomal'	'Hyaluronan Metabolism'	10.9747	0.631499	0
1106	'CGMPt'	'cGMP transport (ATP-dependent)'	'Transport, Extracellular'	0.72743	0	0
1128	'ARGtiDF'	'L-arginine transport via diffusion (extracellular to cytosol)'	'Transport, Extracellular'	43.4963	43.1809	1.59638
1194	'PUNP5'	'purine-nucleoside phosphorylase (Inosine)'	'Purine Catabolism'	0.0361892	0	0
1200	'PRAIS'	'phosphoribosylaminoimidazole synthase'	'IMP Biosynthesis'	1.95989	0	0.105574
1233	'PUNP6'	'purine-nucleoside phosphorylase (Deoxyinosine)'	'Purine Catabolism'	0.00849523	0	0
1270	'PI45P3K'	'phosphatidylinositol 4,5-bisphosphate 3-kinase'	'Inositol Phosphate Metabolism'	0.616576	0	0
1279	'MTHFCm'	'methenyltetrahydrifikate cyclohydrolase, mitochondrial'	'Folate Metabolism'	0.422569	0	0
1280	'PGSr'	'Prostaglandin G/H synthase'	Eicosanoid Metabolism'	487.679	428.13	0
1298	'NDPK8'	'nucleoside-diphosphate kinase (ATP:dADP)'	'Nucleotides'	723.889	642.763	82.7768
1308	'ESTRONESt'	'estrone 3-sulfate transport via bicarbonate countertransport'	'Transport, Extracellular'	1.11903	0	0
1331	'NAt'	'sodium transport (uniport)'	'Transport, Extracellular'	2.21259	0	-660.802
1339	'SQLEr'	'Squalene epoxidase, endoplasmic reticular (NADP)'	Cholesterol Metabolism'	109.712	0	0.0790817
1362	'PLA2_2e'	'phospholipase A2'	Glycerophospholipid Metabolism'	0.530588	0.155351	0
1389	'PYRt2r'	'pyruvate reversible transport via proton symport'	'Transport, Extracellular'	0.198352	0	0
1394	'GMPS2'	'GMP synthase'	'Nucleotides'	278.368	179.265	0.063902
1418	'PUNP7'	'purine-nucleoside phosphorylase (Xanthosine)'	'Nucleotides'	0.00418354	0	0
1438	'PIK3'	'phosphatidylinositol 3-kinase'	'Inositol Phosphate Metabolism'	0.0273231	0	0
1494	'CYTDK1'	'cytidine kinase (ATP)'	'Nucleotides'	5.37921	0	0
1503	'ACACt2'	'acetoacetate transport via proton symport'	'Transport, Extracellular'	1.67294	0	0
1568	'MTHFD2m'	'methylenetetrahydrofolate dehydrogenase (NAD), mitochondrial'	'Folate Metabolism'	0.0158685	0	-46.3684
1609	'GCC2cm'	'glycine-cleavage complex (lipoamide), mitochondrial'	'Glycine, Serine, and Threonine Metabolism'	0.000926642	0	0
1778	'PROSTGE2t3'	'prostaglandine E2 transport (ATP-dependent)'	'Transport, Extracellular'	0.210425	0	0
1781	'HEX4'	'hexokinase (D-mannose:ATP)'	Fructose and Mannose Metabolism'	0.422569	0	0
1789	'PNP'	'purine-nucleoside phosphorylase'	'NAD Metabolism'	0.0145989	0	0
1807	'FOLR2'	'folate reductase'	'Folate Metabolism'	12.3109	0	0
1830	'CBPS'	'carbamoyl-phosphate synthase (glutamine-hydrolysing)'	'Pyrimidine Biosynthesis'	0.146182	0	0.0990041
1853	'BUTt2m'	'Butyrate mitochondrial transport via proton symport, reversible'	'Transport, Mitochondrial'	0.000762435	0	0
1916	'CLHCOtex'	'chloride transport via bicarbonate countertransport'	'Transport, Extracellular'	1.07644	0	0
1970	'NDP8'	'nucleoside-diphosphatase (dUDP)'	'Nucleotides'	16.1011	0	0
1984	'PYDXNK'	'pyridoxine kinase'	'Vitamin B6 Metabolism'	0.00119796	0	0
1995	'ASPGLUm'	'aspartate-glutamate mitochondrial shuttle'	'Transport, Mitochondrial'	1.26131	0	0
2005	'PI5P3K'	'phosphatidylinositol-5-phosphate 3-kinase'	'Inositol Phosphate Metabolism'	10.1607	10	0
2019	'TMDK1'	'thymidine kinase (ATP:thymidine)'	'Nucleotides'	0.00388887	0	0
2034	'GF6PTA'	'glutamine-fructose-6-phosphate transaminase'	'Aminosugar Metabolism '	80.486	66.1468	0
2062	'P5CRxm'	'pyrroline-5-carboxylate reductase (m)'	Arginine and Proline Metabolism'	0.120045	0	0
2065	'GLXO1'	'glyoxylate oxidase'	'Glyoxylate and Dicarboxylate Metabolism'	80.486	66.1468	0
2094	'BTNt2'	'Biotin reversible transport via proton symport'	'Transport, Extracellular'	1.53119	0	0
2123	'CYSTS'	'cystathionine beta-synthase'	'Methionine Metabolism'	293.638	204.494	0
2149	'GARFT'	'phosphoribosylglycinamide formyltransferase'	'IMP Biosynthesis'	283.325	149.302	0.105574
2187	'ACETONEt2'	'acetone transport via proton symport'	'Transport, Extracellular'	0.00739498	0	0
2195	'PI4P3K'	'phosphatidylinositol 4-phosphate 3-kinase'	'Inositol Phosphate Metabolism'	0.0154603	0	0
2218	'FAS140COA'	'fatty-acyl-CoA synthase (n-C14:0CoA)'	'Fatty acid elongation'	281.259	142.876	0
2234	'PRASCS'	'phosphoribosylaminoimidazolesuccinocarboxamide synthase'	'IMP Biosynthesis'	15.0304	0	0.105574
2323	'ATPH2e'	'ATP diphosphohydrolase'	'Nucleotides'	31.1276	19.6211	0
2364	'L_DASH_LACtm'	'L-lactate transport, mitochondrial'	'Transport, Mitochondrial'	0.572447	0	0
2368	'HPYRR2x'	'hydroxypyruvate reductase (NADH)'	'Glyoxylate and Dicarboxylate Metabolism'	0.00984043	0	0
2428	'PYRt2p'	'pyruvate peroxisomal transport via proton symport'	'D-alanine metabolism'	0.00595875	0	0
2451	'ESTRADIOLGLCt2'	' 17-beta-D-glucuronide transport (ATP-dependent)'	'Transport, Extracellular'	27.144	0	0
2464	'HEX1'	'hexokinase (D-glucose:ATP)'	'Glycolysis/Gluconeogenesis'	3.52317	0	3.38032
2504	'ADPRDP'	'ADPribose diphosphatase'	'Nucleotides'	1.75007	0	0
2572	'PI4PLC'	'phosphatidylinositol 4-phosphate phospholipase C'	'Inositol Phosphate Metabolism'	0.197101	0	0
2634	'2HBO'	' 2-Hydroxybutyrate:NAD+ oxidoreductase'	'Propanoate Metabolism'	0.0048973	0	0
2702	'GLUt2m'	'L-glutamate reversible transport via proton symport, mitochondrial'	'Transport, Mitochondrial'	0.305604	0	-7.47917
2741	'PDE4n'	' 3'',5''-cyclic-nucleotide phosphodiesterase, Nucleus'	'Nucleotides'	0.00595875	0	0
2808	'BUTt2r'	'Butyrate transport via proton symport, reversible'	'Transport, Extracellular'	2.55442	0	0
2810	'BILGLCURte'	'bilirubin monoglucuronide transport MDR'	'Transport, Extracellular'	1.34551	0	0
2852	'GCC2am'	'glycine-cleavage complex (lipoamide), mitochondrial'	'Glycine, Serine, and Threonine Metabolism'	5.92629	0.889324	0
2873	'HMBS'	'hydroxymethylbilane synthase'	'Heme Biosynthesis'	0.0078519	0	0
2878	'ADMDC'	'adenosylmethionine decarboxylase'	'Arginine and Proline Metabolism'	0.00171077	0	0
2895	'24_COMMA_25VITD2Hm'	' 24R-Vitamin D-25-hydroxylase (D2)'	'Vitamin D'	0.00163883	0	0
2902	'DHAAt1r'	'dehydroascorbate transport (uniport)'	'Transport, Extracellular'	0.028005	0	0
2908	'RNDR2'	'ribonucleoside-diphosphate reductase (GDP)'	'Nucleotides'	0.146182	0	0.00807825
2910	'THYOXt'	'T4 transport via bicarbonate countertransport'	'Transport, Extracellular'	2.47272	0	0
2941	'DHFR'	'dihydrofolate reductase'	'Folate Metabolism'	0.0133537	0	0.0121166
3038	'PUNP2'	'purine-nucleoside phosphorylase (Deoxyadenosine)'	'Purine Catabolism'	0.0937582	0	0
3055	'URIK1'	'uridine kinase (ATP:Uridine)'	'Pyrimidine Biosynthesis'	0.531293	0	0
3123	'2HBt2'	' 2-hydroxybutyrate cotransport with proton'	'Transport, Extracellular'	12.9072	10	0
3164	'KAS8'	'b-ketoacyl synthetase (palmitate, n-C16:0)'	'Fatty acid elongation'	0.0137426	0	0
3248	'PSP_L'	'phosphoserine phosphatase (L-serine)'	'Glycine, Serine, and Threonine Metabolism'	0.50053	0	0.190641
3267	'G5SDym'	'glutamate-5-semialdehyde dehydrogenase (m)'	'Urea cycle/amino group metabolism'	0.0171548	0	0
3271	'GLUNm'	'glutaminase (mitochondrial)'	'Glutamate metabolism'	0.00282788	0	0
3289	'SO4HCOtex'	'sulfate transport via bicarbonate countertransport'	'Transport, Extracellular'	0.0197558	0	0
3296	'ASNS1'	'asparagine synthase (glutamine-hydrolysing)'	'Alanine and Aspartate Metabolism'	0.00821777	0	0
3373	'D_DASH_LACt2'	'D-lactate transport via proton symport'	'Transport, Extracellular'	0.216318	0	10
3405	'AHEXASE2ly'	'beta-N-acetylhexosaminidase, lysosomal'	'N-Glycan Degradation'	0.0204189	0	0
3410	'PSERT'	'phosphoserine transaminase'	'Glycine, Serine, and Threonine Metabolism'	604.381	537.442	0.190641
3442	'DTMPK'	'dTMP kinase'	'Nucleotides'	0.0478462	0	0
3451	'GCCbim'	'glycine-cleavage complex (lipoylprotein) irreversible, mitochondrial'	'Glycine, Serine, and Threonine Metabolism'	1.65125	0	0
3461	'CAMPt'	'cAMP transport (ATP-dependent)'	'Transport, Extracellular'	0.709426	0	0
3511	'CYOOm3'	'cytochrome c oxidase, mitochondrial Complex IV'	'Oxidative Phosphorylation'	380.076	226.407	22.0845
319	'MCLOR'	' 3-Mercaptolactate:NAD+ oxidoreductase'	'Cysteine Metabolism'	-7.89652	-4.04216	0
369	'TRIODTHYt'	'T3 transport via bicarbonate countertransport'	'Transport, Extracellular'	-471.26	-306.614	0
475	'UREAtm'	'Urea transport via diffusion'	'Urea cycle/amino group metabolism'	-10.2535	-6.56294	0
586	'PROSTGE2t'	'prostaglandin transport via bicarbonate countertransport'	'Transport, Extracellular'	-476.847	-306.795	0
893	'CITtam'	'citrate transport, mitochondrial'	'Transport, Mitochondrial'	-3.90823	0	0
932	'NDPK10n'	'nucleoside-diphosphate kinase (ATP:dIDP), nuclear'	'Nucleotides'	-278.368	-179.265	-108.455
1090	'NDPK1n'	'nucleoside-diphosphate kinase (ATP:GDP), nuclear'	'Nucleotides'	-285.377	-146.966	79.791
1242	'ESTRADIOLGLCt'	'estradiol glucuronide transport via bicarbonate countertransport'	'Transport, Extracellular'	-0.00699831	0	0
1331	'NAt'	'sodium transport (uniport)'	'Transport, Extracellular'	-582.746	-453.778	-660.802
1389	'PYRt2r'	'pyruvate reversible transport via proton symport'	'Transport, Extracellular'	-424.242	-330.965	0
1602	'KCCt'	'K+-Cl- cotransport'	'Transport, Extracellular'	-412.476	-18.0818	43.7214
1789	'PNP'	'purine-nucleoside phosphorylase'	'NAD Metabolism'	-0.0141074	0	0
2044	'TCHOLAt'	'taurocholate transport via bicarbonate countertransport'	'Transport, Extracellular'	-518.352	-376.911	0
2428	'PYRt2p'	'pyruvate peroxisomal transport via proton symport'	'D-alanine metabolism'	-0.0548272	0	0
2634	'2HBO'	' 2-Hydroxybutyrate:NAD+ oxidoreductase'	'Propanoate Metabolism'	-8.76642	-8.60616	0
2910	'THYOXt'	'T4 transport via bicarbonate countertransport'	'Transport, Extracellular'	-470.095	-307.845	0
3123	'2HBt2'	' 2-hydroxybutyrate cotransport with proton'	'Transport, Extracellular'	-8.76642	-8.60616	0
456	'GALt2_2'	'D-galactose transport via proton symport'	'Transport, Extracellular'	-579.703	-445.222	0
1856	'NKCC2t'	'Na+-K+-Cl- cotransport (NH4+)'	'Transport, Extracellular'	-328.462	-309.246	-23.188
2270	'ALATA_L'	'L-alanine transaminase'	'Glutamate metabolism'	-87.3558	-74.9429	-10.5603
